# Supplementary material for: Synthesis and In Vitro Anticancer Evaluation of Novel Chrysin and 7-Aminochrysin Derivatives
Source: PubMed Central journal article supplement (PMC7070641; doi:10.3390/molecules25040888), 2020-02-17
Supplement: molecules-25-00888-s001.pdf [file molecules-25-00888-s001.pdf]

Article

# Synthesis and *In Vitro* Anticancer Evaluation of Novel Chrysin and 7-aminochrysin Derivatives

Szabolcs Mayer<sup>1</sup>, Péter Keglevich<sup>1\*</sup>, Péter Ábrányi-Balogh<sup>2\*</sup>, Áron Szigetvári<sup>3</sup>, Miklós Dékány<sup>3</sup>, Csaba Szántay Jr.<sup>3</sup> and László Hazai<sup>1</sup>

<sup>1</sup> Department of Organic Chemistry and Technology, Faculty of Chemical Technology and Biotechnology, Budapest University of Technology and Economics, H-1111 Budapest, Gellért tér 4., Hungary; mayer.szabolcs@mail.bme.hu (S. M.); hazai@mail.bme.hu (L.H)

<sup>2</sup> Medicinal Chemistry Research Group, Institute of Organic Chemistry, Research Centre for Natural Sciences, H-1117 Budapest, Magyar tudósok krt. 2., Hungary

<sup>3</sup> Spectroscopic Research Department, Gedeon Richter Plc., H-1475 Budapest 10, P. O. Box 27, Hungary; szigetvaria@richter.hu (Á. S.); m.dekany@richter.hu (M. D.); cs.szantay@richter.hu (C.S.J)

\* Correspondence: pkeglevich@mail.bme.hu (P.K); abranyi-balogh.peter@ttk.hu (P.Á.-B.)

## Supplementary materials:

### S.1. Chemistry

#### S.1.1. 2-((5-Hydroxy-4-oxo-2-phenyl-4*H*-chromen-7-yl)oxy)-*N*-phenylacetamide (7)

Chrysin (1) (100 mg, 0.39 mmol), 2-chloro-*N*-phenylacetamide (2) (71 mg, 0.42 mmol) and anhydrous potassium carbonate (56 mg, 0.41 mmol) were dissolved in DMF (4 mL). The reaction mixture was stirred at room temperature for 46 h, then, it was poured into water (30 mL). After filtering off the precipitate, the filtrate was extracted with DCM (3 × 30 mL). The combined organic layer was dried over MgSO<sub>4</sub> and concentrated *in vacuo*. The filtered precipitation and the crude product obtained by extraction were purified separately with preparative TLC (DCM : MeOH = 60 : 1). Combining the pure products 135 mg (89 %) of compound 7 was isolated as a white solid. M.p.: 227–228 °C. TLC (DCM : MeOH = 60 : 1); R<sub>f</sub> = 0.41. IR (KBr) 3421, 3401, 1693, 1661, 1532, 1170, 831 cm<sup>-1</sup>. <sup>1</sup>H NMR (499.9 MHz; DMSO-*d*<sub>6</sub>) δ (ppm) 4.88 (s; 2H; C(7)-OCH<sub>2</sub>); 6.51 (d; *J* = 2.3 Hz; 1H; H-6); 6.90 (d; *J* = 2.3 Hz; 1H; H-8); 7.07 (s; 1H; H-3); 7.07–7.10 (m; 1H; H-4''); 7.31–7.36 (m; 2H; H-3'', H-5''); 7.57–7.61 (m; 2H; H-3', H-5'); 7.61–7.66 (m; 3H; H-4', H-2'', H-6''); 8.09–8.13 (m; 2H; H-2', H-6'); 10.16 (s; 1H; C(1'')-NH); 12.84 (s; 1H; C(5)-OH). <sup>13</sup>C NMR (125.7 MHz; DMSO-*d*<sub>6</sub>) δ (ppm) 67.2 (C(7)-OCH<sub>2</sub>); 93.6 (C-8); 98.6 (C-6); 105.2 (C-10); 105.3 (C-3); 119.5 (C-2'', C-6''); 123.7 (C-4''); 126.4 (C-2', C-6'); 128.7 (C-3'', C-5''); 129.1 (C-3', C-5'); 130.5 (C-1'); 132.1 (C-4'); 138.2 (C-1''); 157.1 (C-9); 161.1 (C-5); 163.5 (C-2); 163.8 (C-7); 165.5 (C(1'')-NH-CO); 182.0 (C-4). EI-HRMS: M=387.11020 (delta=0.2 ppm; C<sub>23</sub>H<sub>17</sub>O<sub>5</sub>N).

#### S.1.2. 2-((5-Hydroxy-4-oxo-2-phenyl-4*H*-chromen-7-yl)oxy)-*N*-(*o*-tolyl)acetamide (8)

Chrysin (1) (100 mg, 0.39 mmol), 2-chloro-*N*-(*o*-tolyl)acetamide (3) (76 mg, 0.41 mmol) and anhydrous potassium carbonate (56 mg, 0.41 mmol) were dissolved in DMF (4 mL). The reaction mixture was stirred at room temperature for 28 h, then, it was poured into water (30 mL). After filtering off the precipitate, the filtrate was extracted with DCM (3 × 30 mL). The combined organic layer was dried over MgSO<sub>4</sub> and concentrated *in vacuo*. The filtered precipitation and the crude product obtained by extraction were purified separately with preparative TLC (DCM : MeOH = 40 : 1). Combining the pure products 155 mg (98 %) of compound 8 was isolated as a white solid. M.p.: 236–237 °C. TLC (DCM : MeOH = 40 : 1); R<sub>f</sub> = 0.51. IR (KBr) 3422, 3059, 1690, 1661, 1358, 1171, 1044, 753 cm<sup>-1</sup>. <sup>1</sup>H NMR (499.9 MHz; DMSO-*d*<sub>6</sub>) δ (ppm) 2.22 (s; 3H; C(2'')-CH<sub>3</sub>); 4.91 (s; 2H; C(7)-OCH<sub>2</sub>); 6.53 (d; *J* = 2.1 Hz; 1H; H-6); 6.91 (d; *J* = 2.1 Hz; 1H; H-8); 7.08 (s; 1H; H-3); 7.10–7.15 (m; 1H; H-4''); 7.17–7.21 (m; 1H; H-5''); 7.22–7.26 (m; 1H; H-3''); 7.40–7.43 (m; 1H; H-6''); 7.58–7.62 (m; 2H; H-3', H-

5'); 7.62–7.66 (m; 1H; H-4'); 8.09–8.13 (m; 2H; H-2', H-6'); 9.60 (br s; 1H; C(1'')-NH); 12.83 (br s; 1H; C(5)-OH). <sup>13</sup>C NMR (125.7 MHz; DMSO-*d*<sub>6</sub>) δ (ppm) 17.6 (C(2'')-CH<sub>3</sub>); 67.2 (C(7)-OCH<sub>2</sub>); 93.6 (C-8); 98.7 (C-6); 105.2 (C-10); 105.4 (C-3); 125.2 (C-6''); 125.6 (C-4''); 126.0 (C-5''); 126.4 (C-2', C-6'); 129.1 (C-3', C-5'); 130.3 (C-3''); 130.5 (C-1'); 132.1 (C-4', C-2''); 135.3 (C-1''); 157.1 (C-9); 161.1 (C-5); 163.5 (C-2); 163.7 (C-7); 165.7 (C(1'')-NH-CO); 182.0 (C-4). HRMS: M-H=400.11924 (delta=0.49 ppm; C<sub>24</sub>H<sub>18</sub>O<sub>5</sub>N). HR-ESI-MS-MS (CID=35%; rel. int. %): 342(61); 293(19); 253(100).

### S.1.3. 2-((5-Hydroxy-4-oxo-2-phenyl-4*H*-chromen-7-yl)oxy)-*N*-(2-methoxyphenyl)acetamide (**9**)

Chrysin (**1**) (50 mg, 0.20 mmol), 2-chloro-*N*-(2-methoxyphenyl)acetamide (**4**) (41 mg, 0.21 mmol) and anhydrous potassium carbonate (28 mg, 0.21 mmol) were dissolved in DMF (2 mL). The reaction mixture was stirred at room temperature for 29 h, then, it was poured into water (15 mL). After filtering off the precipitate, the filtrate was extracted with DCM (3 x 15 mL). The combined organic layer was dried over MgSO<sub>4</sub> and concentrated *in vacuo*. The filtered precipitation and the crude product obtained by extraction were purified separately with preparative TLC (DCM : MeOH = 40 : 1). Combining the pure products 66 mg (80 %) of compound **9** was isolated as a white solid. M.p.: 214–215 °C. TLC (DCM : MeOH = 40 : 1); R<sub>f</sub> = 0.43. IR (KBr) 3403, 3075, 1660, 1450, 1338, 1171, 832, 498 cm<sup>-1</sup>. <sup>1</sup>H NMR (799.7 MHz; CDCl<sub>3</sub>) δ (ppm) 3.91 (s; 3H; C(2'')-OCH<sub>3</sub>); 4.71 (s; 2H; C(7)-OCH<sub>2</sub>); 6.51 (d; J = 2.3 Hz; 1H; H-6); 6.60 (d; J = 2.3 Hz; 1H; H-8); 6.71 (s; 1H; H-3); 6.91 (dd; J = 8.2, 1.2 Hz; 1H; H-3''); 6.99 (ddd; J = 8.0, 7.5, 1.2 Hz; 1H; H-5''); 7.10 (ddd; J = 8.2, 7.5, 1.6 Hz; 1H; H-4''); 7.53–7.56 (m; 2H; H-3', H-5'); 7.56–7.59 (m; 1H; H-4'); 7.89–7.92 (m; 2H; H-2', H-6'); 8.40 (dd; J = 8.0, 1.6 Hz; 1H; H-6''); 8.87 (br s; C(1'')-NH); 12.79 (s; 1H; C(5)-OH). <sup>13</sup>C NMR (201.1 MHz; CDCl<sub>3</sub>) δ (ppm) 55.9 (C(2'')-OCH<sub>3</sub>); 67.8 (C(7)-OCH<sub>2</sub>); 92.9 (C-8); 99.4 (C-6); 106.1 (C-3); 106.7 (C-10); 110.1 (C-3''); 119.9 (C-6''); 121.1 (C-5''); 124.6 (C-4''); 126.4 (C-2', C-6'); 126.5 (C-1''); 129.2 (C-3', C-5'); 131.1 (C-1'); 132.1 (C-4'); 148.2 (C-2''); 157.9 (C-9); 162.4 (C-5); 162.6 (C-7); 164.4 (C-2); 164.7 (C(1'')-NH-CO); 182.5 (C-4). HRMS: M+H=418.12807 (delta=-1.1 ppm; C<sub>24</sub>H<sub>20</sub>O<sub>6</sub>N). HR-ESI-MS-MS (CID=35%; rel. int. %): 400(11); 295(100); 267(57); 255(38); 237(5); 136(9).

### S.1.4. *N*-(3,5-Dimethoxyphenyl)-2-((5-hydroxy-4-oxo-2-phenyl-4*H*-chromen-7-yl)oxy)acetamide (**10**)

Chrysin (**1**) (100 mg, 0.39 mmol), 2-chloro-*N*-(3,5-dimethoxyphenyl)acetamide (**5**) (95 mg, 0.41 mmol) and anhydrous potassium carbonate (56 mg, 0.41 mmol) were dissolved in DMF (4 mL). The reaction mixture was stirred at room temperature for 35 h, then, it was poured into water (30 mL). The precipitate was filtered off to afford 169 mg (96 %) of compound **10** as a white solid. M.p.: 237–238 °C. TLC (DCM : MeOH = 40 : 1); R<sub>f</sub> = 0.39. IR (KBr) 3288, 1665, 1613, 1376, 1159, 825 cm<sup>-1</sup>. <sup>1</sup>H NMR (499.9 MHz; DMSO-*d*<sub>6</sub>) δ (ppm) 3.72 (s; 6H; C(3'')-OCH<sub>3</sub>, C(5'')-OCH<sub>3</sub>); 4.86 (s; 2H; C(7)-OCH<sub>2</sub>); 6.26 (t; J = 2.3 Hz; 1H; H-4''); 6.50 (d; J = 2.3 Hz; 1H; H-6); 6.89 (d; J = 2.3 Hz; 1H; H-8); 6.91 (d; J = 2.3 Hz; 2H; H-2'', H-6''); 7.07 (s; 1H; H-3); 7.57–7.62 (m; 2H; H-3', H-5'); 7.62–7.66 (m; 1H; H-4'); 8.09–8.12 (m; 2H; H-2', H-6'); 10.10 (s; 1H; C(1'')-NH); 12.79 (br s; 1H; C(5)-OH). <sup>13</sup>C NMR (125.7 MHz; DMSO-*d*<sub>6</sub>) δ (ppm) 55.0 (C(3'')-OCH<sub>3</sub>, C(5'')-OCH<sub>3</sub>); 67.1 (C(7)-OCH<sub>2</sub>); 93.6 (C-8); 95.6 (C-4''); 97.8 (C-2'', C-6''); 98.6 (C-6); 105.2 (C-10); 105.3 (C-3); 126.4 (C-2', C-6'); 129.1 (C-3', C-5'); 130.5 (C-1'); 132.1 (C-4'); 139.9 (C-1''); 157.1 (C-9); 160.4 (C-3'', C-5''); 161.1 (C-5); 163.5 (C-2); 163.8 (C-7); 165.6 (C(1'')-NH-CO); 182.0 (C-4). HRMS: M+H=448.13910 (delta=0.05 ppm; C<sub>25</sub>H<sub>22</sub>O<sub>7</sub>N). HR-ESI-MS-MS (CID=55%; rel. int. %): 430(6); 412(3); 295(100); 267(5); 255(3).

### S.1.5. 2-((5-Hydroxy-4-oxo-2-phenyl-4*H*-chromen-7-yl)oxy)-*N*-(2-(trifluoromethyl)phenyl)acetamide (**11**)

Chrysin (**1**) (50 mg, 0.20 mmol), 2-chloro-*N*-(2-(trifluoromethyl)phenyl)acetamide (**6**) (49 mg, 0.21 mmol) and anhydrous potassium carbonate (28 mg, 0.20 mmol) were dissolved in DMF (2 mL). The reaction mixture was stirred at room temperature for 24 h, then, it was poured into water (30 mL). After filtering off the precipitate, the filtrate was extracted with DCM (3 x 30 mL). The

combined organic layer was dried over  $\text{MgSO}_4$  and concentrated *in vacuo*. The filtered precipitation and the crude product obtained by extraction were purified separately with preparative TLC (DCM : MeOH = 40 : 1). Combining the pure products 84 mg (94 %) of compound **11** was isolated as a white solid. M.p.: 263 °C (decomp.). TLC (DCM : MeOH = 40 : 1);  $R_f$  = 0.64. IR (KBr) 3425, 3076, 1707, 1663, 1170, 1117, 766, 758  $\text{cm}^{-1}$ .  $^1\text{H}$  NMR (399.8 MHz; DMSO- $d_6$ )  $\delta$  (ppm) 4.92 (s; 2H; C(7)-OCH<sub>2</sub>); 6.47 (br d;  $J$  = 1.4 Hz; 1H; H-6); 6.84 (br d;  $J$  = 1.4 Hz; 1H; H-8); 7.07 (s; 1H; H-3); 7.46–7.52 (m; 1H; H-4''); 7.57–7.67 (m; 4H; H-3', H-5', H-6'', H-4'); 7.69–7.75 (m; 1H; H-5''); 7.75–7.80 (m; 1H; H-3''); 8.08–8.13 (m; 2H; H-2', H-6'); 9.9 (br; C(1'')-NH); 12.8 (br; C(5)-OH).  $^{13}\text{C}$  NMR (101.5 MHz; DMSO- $d_6$ )  $\delta$  (ppm) 67.0 (C(7)-OCH<sub>2</sub>); 93.3 (br; C-8); 98.7 (C-6); 105.4 (C-3, C-10); 123.5 (q;  $^1J_{\text{FC}}$  = 273.6 Hz; C(2'')-CF<sub>3</sub>); 124.5 (q;  $^2J_{\text{FC}}$  = 29.3 Hz; C-2''); 126.2–126.4 (m; C-3'', C-2', C-6'); 126.9 (C-4''); 129.1 (C-3', C-5''); 129.5 (C-6''); 130.5 (C-1'); 132.1 (C-4'); 133.1 (C-5''); 134.6 (C-1''); 157.2 (C-9); 161.3 (C-5); 163.4 (C-7, C-2); 166.8 (C(1'')-NH-CO); 182.0 (C-4).  $^{19}\text{F}$  NMR (376.2 MHz; DMSO- $d_6$ )  $\delta$  (ppm; ref.: CFCl<sub>3</sub>) -59.3. HRMS: M+H=456.10417 (delta=-2.6ppm; C<sub>24</sub>H<sub>17</sub>O<sub>5</sub>NF<sub>3</sub>). HR-ESI-MS-MS (CID=35%; rel. int. %): 416(4); 396(100); 368(3); 358(5); 352(20); 295(3); 267(7); 255(15); 237(2).

### S.1.6. 5-Hydroxy-2-phenyl-7-(phenylamino)-4H-chromen-4-one (**12**)

Chrysin (**1**) (100 mg, 0.39 mmol), 2-chloro-*N*-phenylacetamide (**2**) (71 mg, 0.42 mmol) and anhydrous potassium carbonate (112 mg, 0.79 mmol) were dissolved in DMF (4 mL). The reaction mixture was stirred at 85 °C for 49 h, then, it was poured into water (30 mL). After filtering off the precipitate, the filtrate was diluted with saturated NaCl solution (10 mL) and extracted with DCM (3 x 30 mL). The combined organic layer was washed with water (20 mL), dried over  $\text{MgSO}_4$  and concentrated *in vacuo*. The filtered precipitation and the crude product obtained by extraction were purified separately with preparative TLC (DCM : MeOH = 60 : 1). Combining the pure products 37 mg (29 %) of compound **12** was isolated as a yellow solid. M.p.: 233–236 °C. TLC (DCM : MeOH = 60 : 1);  $R_f$  = 0.70. IR (KBr) 3307, 3202, 1654, 1619, 1406, 1171, 744, 504  $\text{cm}^{-1}$ .  $^1\text{H}$  NMR (499.9 MHz; DMSO- $d_6$ )  $\delta$  (ppm) 6.32 (d;  $J$  = 1.9 Hz; 1H; H-6); 6.66 (d;  $J$  = 1.9 Hz; 1H; H-8); 6.94 (s; 1H; H-3); 7.09–7.14 (m; 1H; H-4''); 7.25–7.29 (m; 2H; H-2'', H-6''); 7.38–7.43 (m; 2H; H-3'', H-5''); 7.54–7.62 (m; 3H; H-3', H-5', H-4'); 8.05–8.09 (m; 2H; H-2', H-6'); 9.10 (s; 1H; C(7)-NH); 12.80 (s; 1H; C(5)-OH).  $^{13}\text{C}$  NMR (125.7 MHz; DMSO- $d_6$ )  $\delta$  (ppm) 90.9 (C-8); 97.0 (C-6); 103.2 (C-10); 105.1 (C-3); 121.0 (C-2'', C-6''); 123.2 (C-4''); 126.3 (C-2', C-6'); 129.0 (C-3', C-5'); 129.4 (C-3'', C-5''); 130.7 (C-1'); 131.8 (C-4'); 140.1 (C-1''); 151.3 (C-7); 157.6 (C-9); 160.9 (C-5); 162.7 (C-2); 181.0 (C-4). EI-HRMS: M=329.10387 (delta=-2.4 ppm; C<sub>21</sub>H<sub>15</sub>O<sub>3</sub>N).

### S.1.7. 5-Hydroxy-2-phenyl-7-(*o*-tolylamino)-4H-chromen-4-one (**13**)

Chrysin (**1**) (50 mg, 0.20 mmol), 2-chloro-*N*-(*o*-tolyl)acetamide (**3**) (38 mg, 0.21 mmol) and anhydrous potassium carbonate (56 mg, 0.41 mmol) were dissolved in DMF (2 mL). The reaction mixture was stirred at 80 °C for 61 h, then, it was evaporated under reduced pressure. Water (30 mL) was added to the residue and it was extracted with DCM (30 mL). Then, saturated NaCl solution (20 mL) was added to the aqueous phase and it was extracted with DCM (2 x 20 mL). The combined organic layer was dried over  $\text{MgSO}_4$  and concentrated *in vacuo*. The crude product was purified with preparative TLC (DCM : MeOH = 40 : 1) to give 31 mg (46 %) of compound **13** as a yellow solid. M.p.: 220–221 °C. TLC (DCM : MeOH = 40 : 1);  $R_f$  = 0.69. IR (KBr) 3417, 3059, 1660, 1450, 1172, 1045, 766  $\text{cm}^{-1}$ .  $^1\text{H}$  NMR (499.9 MHz; DMSO- $d_6$ )  $\delta$  (ppm) 2.22 (s; 3H; C(2'')-CH<sub>3</sub>); 6.10 (d;  $J$  = 2.0 Hz; 1H; H-6); 6.24 (d;  $J$  = 2.0 Hz; 1H; H-8); 6.89 (s; 1H; H-3); 7.16–7.21 (m; 1H; H-4''); 7.25–7.30 (m; 2H; H-5'', H-6''); 7.33–7.36 (m; 1H; H-3''); 7.52–7.56 (m; 2H; H-3', H-5'); 7.57–7.61 (m; 1H; H-4'); 8.01–8.04 (m; 2H; H-2', H-6'); 8.61 (s; 1H; C(7)-NH); 12.81 (s; 1H; C(5)-OH).  $^{13}\text{C}$  NMR (125.7 MHz; DMSO- $d_6$ )  $\delta$  (ppm) 17.6 (C(2'')-CH<sub>3</sub>); 90.1 (C-8); 96.0 (C-6); 102.5 (C-10); 105.0 (C-3); 125.5 (C-6''); 125.6 (C-4''); 126.2 (C-2', C-6'); 126.8 (C-5''); 129.0 (C-3', C-5'); 130.7 (C-1'); 131.1 (C-3''); 131.7 (C-4'); 133.4 (C-2''); 137.9 (C-1''); 153.2 (C-7); 157.6 (C-9); 161.0 (C-5); 162.5 (C-2); 180.9 (C-4). HRMS: M+H=344.12840 (delta=0.81ppm; C<sub>22</sub>H<sub>18</sub>O<sub>3</sub>N).

HR-ESI-MS-MS (CID=65%; rel. int. %): 326(32); 311(3); 288(4); 270(2); 242(100); 225(13); 209(8); 172(7); 158(3); 129(5).

#### S.1.8. 5-Hydroxy-7-((2-methoxyphenyl)amino)-2-phenyl-4H-chromen-4-one (14)

Chrysin (1) (150 mg, 0.59 mmol), 2-chloro-*N*-(2-methoxyphenyl)acetamide (4) (126 mg, 0.63 mmol) and anhydrous potassium carbonate (168 mg, 1.2 mmol) were dissolved in DMF (10 mL). The reaction mixture was stirred at 105 °C for 31 h, then, it was evaporated under reduced pressure. Water (30 mL) was added to the residue and it was extracted with DCM (4x 40 mL). The combined organic layer was dried over MgSO<sub>4</sub> and concentrated *in vacuo*. The crude product was purified with preparative TLC (DCM : MeOH = 40 : 1) to give 71 mg (33 %) of compound 14 as a yellow solid. M.p.: 156-157 °C. TLC (DCM : MeOH = 40 : 1); R<sub>f</sub> = 0.90. IR (KBr) 3348, 2963, 1668, 1586, 1512, 1257, 1227, 1024, 736 cm<sup>-1</sup>. <sup>1</sup>H NMR (499.9 MHz; DMSO-*d*<sub>6</sub>) δ (ppm) 3.82 (s; 3H; C(2'')-OCH<sub>3</sub>); 6.23 (d; J = 2.0 Hz; 1H; H-6); 6.42 (d; J = 2.0 Hz; 1H; H-8); 6.89 (s; 1H; H-3); 7.00 (ddd; J = 7.8, 7.3, 1.3 Hz; 1H; H-5''); 7.14 (dd; J = 8.3, 1.3 Hz; 1H; H-3''); 7.20 (ddd; J = 8.3, 7.3, 1.5 Hz; 1H; H-4''); 7.33 (dd; J = 7.8, 1.5 Hz; 1H; H-6''); 7.53–7.57 (m; 2H; H-3', H-5'); 7.57–7.61 (m; 1H; H-4'); 8.01–8.05 (m; 2H; H-2', H-6'); 8.53 (s; 1H; C(7)-NH); 12.77 (s; 1H; C(5)-OH). <sup>13</sup>C NMR (125.7 MHz; DMSO-*d*<sub>6</sub>) δ (ppm) 55.4 (C(2'')-OCH<sub>3</sub>); 90.6 (C-8); 96.6 (C-6); 102.5 (C-10); 105.0 (C-3); 112.2 (C-3''); 120.6 (C-5''); 124.3 (C-6''); 125.6 (C-4''); 126.2 (C-2', C-6'); 128.1 (C-1''); 129.0 (C-3', C-5'); 130.8 (C-1'); 131.7 (C-4'); 152.6, 152.7 (C-9, C-2''); 157.5 (C-7); 160.8 (C-5); 162.5 (C-2); 180.9 (C-4). HRMS: M+H=360.12216 (delta=-2.4 ppm; C<sub>22</sub>H<sub>18</sub>O<sub>4</sub>N). HR-ESI-MS-MS (CID=55%; rel. int. %): 345(100); 344(25); 330(2); 328(48); 327(2); 240(2).

#### S.1.9. 7-((3,5-Dimethoxyphenyl)amino)-5-hydroxy-2-phenyl-4H-chromen-4-one (15)

Chrysin (1) (50 mg, 0.20 mmol), 2-chloro-*N*-(3,5-dimethoxyphenyl)acetamide (5) (48 mg, 0.21 mmol) and anhydrous potassium carbonate (56 mg, 0.41 mmol) were dissolved in DMF (4 mL). The reaction mixture was stirred at 90 °C for 58 h, then, it was evaporated under reduced pressure. Water (20 mL) was added to the residue and it was extracted with DCM (4 x 20 mL). The combined organic layer was washed with water (20 mL), dried over MgSO<sub>4</sub> and concentrated *in vacuo*. The crude product was purified with preparative TLC (DCM : MeOH = 40 : 1) to give 22 mg (29 %) of compound 15 as a yellow solid. M.p.: 202-203 °C. TLC (DCM : MeOH = 40 : 1); R<sub>f</sub> = 0.68. IR (KBr) 3276, 2998, 2832, 1660, 1615, 1450, 1208, 1154, 673 cm<sup>-1</sup>. <sup>1</sup>H NMR (799.7 MHz; DMSO-*d*<sub>6</sub>) δ (ppm) 3.76 (s; 6H; C(3'')-OCH<sub>3</sub>, C(5'')-OCH<sub>3</sub>); 6.27 (t; J = 2.2 Hz; 1H; H-4''); 6.34 (d; J = 1.9 Hz; 1H; H-6); 6.39 (d; J = 2.2 Hz; 2H; H-2'', H-6''); 6.70 (d; J = 1.9 Hz; 1H; H-8); 6.94 (s; 1H; H-3); 7.55–7.58 (m; 2H; H-3', H-5'); 7.59–7.62 (m; 1H; H-4'); 8.06–8.09 (m; 2H; H-2', H-6'); 9.07 (s; 1H; C(7)-NH); 12.80 (s; 1H; C(5)-OH). <sup>13</sup>C NMR (201.1 MHz; DMSO-*d*<sub>6</sub>) δ (ppm) 55.1 (C(3'')-OCH<sub>3</sub>, C(5'')-OCH<sub>3</sub>); 91.6 (C-8); 95.0 (C-4''); 97.5 (C-6); 98.9 (C-2'', C-6''); 103.3 (C-10); 105.1 (C-3); 126.3 (C-2', C-6'); 129.0 (C-3', C-5'); 130.7 (C-1'); 131.8 (C-4'); 141.9 (C-1''); 150.9 (C-7); 157.5 (C-9); 160.8 (C-5); 161.0 (C-3'', C-5''); 162.8 (C-2); 181.0 (C-4). HRMS: M+H=390.13374 (delta=0.4ppm; C<sub>23</sub>H<sub>20</sub>O<sub>5</sub>N). HR-ESI-MS-MS (CID=65%; rel. int. %): 374(100); 357(7); 343(2).

#### S.2.10. *N*-(5-Hydroxy-4-oxo-2-phenyl-4H-chromen-7-yl)-2-(2-(trifluoromethyl)phenoxy)-acetamide (20)

Chrysin (1) (100 mg, 0.39 mmol), 2-chloro-*N*-(2-(trifluoromethyl)phenyl)acetamide (6) (98 mg, 0.41 mmol) and anhydrous potassium carbonate (112 mg, 0.81 mmol) were dissolved in DMF (4 mL). The reaction mixture was stirred at 75 °C for 9 h, then, it was poured into water (30 mL). After filtering off the precipitate, the filtrate was diluted with saturated NaCl solution (30 mL) and extracted with DCM (4 x 30 mL). The combined organic layer was washed with water (30 mL), dried over MgSO<sub>4</sub> and concentrated *in vacuo*. The filtered precipitation and the crude product obtained by extraction were purified separately with preparative TLC (DCM : MeOH = 60 : 1). Combining the pure products 50 mg (28 %) of compound 20 was isolated as a white solid. M.p.: 210-212 °C. TLC

(DCM : MeOH = 60 : 1);  $R_f = 0.71$ . IR (KBr) 3398, 3057, 1662, 1524, 1323, 1132, 759, 674  $\text{cm}^{-1}$ .  $^1\text{H}$  NMR (499.9 MHz; DMSO- $d_6$ )  $\delta$  (ppm) 4.99 (s; 2H; C(1'')-OCH $_2$ ); 6.90 (d;  $J = 1.7$  Hz; 1H; H-6); 7.08 (s; 1H; H-3); 7.14 (t;  $J = 7.5$  Hz; 1H; H-4''); 7.21 (d;  $J = 8.5$  Hz; 1H; H-6''); 7.56–7.67 (m; 6H; H-3', H-5', H-4', H-5'', H-3'', H-8); 8.09–8.13 (m; 2H; H-2', H-6'); 10.69 (s; 1H; C(7)-NH); 12.71 (s; 1H; C(5)-OH).  $^{13}\text{C}$  NMR (125.7 MHz; DMSO- $d_6$ )  $\delta$  (ppm) 67.0 (C(1'')-OCH $_2$ ); 97.3 (C-8); 101.1 (C-6); 105.5 (C-3); 106.5 (C-10); 113.6 (C-6''); 117.0 (q;  $^2J_{\text{FC}} = 30.2$  Hz; C-2''); 120.8 (C-4''); 123.6 (q;  $^1J_{\text{FC}} = 272.1$  Hz; C(2'')-CF $_3$ ); 126.5 (C-2', C-6'); 126.8 (q;  $^3J_{\text{FC}} = 4.9$  Hz; C-3''); 129.1 (C-3', C-5'); 130.5 (C-1'); 132.2 (C-4'); 134.0 (C-5''); 144.8 (C-7); 155.7 (C-1''); 156.6 (C-9); 160.2 (C-5); 163.8 (C-2); 166.7 (C(7)-NH-CO); 182.0 (C-4). HRMS:  $M+H=456.10404$  ( $\delta=2.8$  ppm;  $\text{C}_{24}\text{H}_{17}\text{O}_5\text{NF}_3$ ). HR-ESI-MS-MS (CID=35%; rel. int. %): 436(82); 416(59); 396(22); 388(100); 358(69); 314(25); 294(59); 266(76).

**Table S1.** Energy values obtained for the computation of the 1→2 transformation and the related dimerization. The E, ZPE, U, H and G values were computed using the B3LYP/6-31 (d,p) method and are given in Hartree.

| ID    | E            | ZPE          | U            | H            | G            |
|-------|--------------|--------------|--------------|--------------|--------------|
| 1-H*  | -686.329374  | -686.178589  | -686.16757   | -686.166626  | -686.215244  |
| 2     | -899.880062  | -899.733174  | -899.723225  | -899.722281  | -899.771061  |
| TS2   | -1586.200932 | -1585.902769 | -1585.880373 | -1585.879429 | -1585.958358 |
| 7     | -1586.256283 | -1585.954988 | -1585.932413 | -1585.931469 | -1586.011925 |
| TS17a | -1125.349621 | -1125.064369 | -1125.045192 | -1125.044248 | -1125.112469 |
| 18a   | -1125.35433  | -1125.068375 | -1125.048709 | -1125.047765 | -1125.118161 |
| TS18a | -1201.789305 | -1201.479757 | -1201.457341 | -1201.456397 | -1201.532498 |
| 19a   | -1201.797901 | -1201.48845  | -1201.465642 | -1201.464698 | -1201.54203  |
| TS19a | -2590.113717 | -2589.788308 | -2589.759818 | -2589.758874 | -2589.851482 |
| 12    | -2590.165232 | -2589.837609 | -2589.806734 | -2589.80579  | -2589.907816 |
| 3     | -939.196944  | -939.021998  | -939.010525  | -939.009581  | -939.061674  |
| TS4   | -1625.52009  | -1625.193985 | -1625.170077 | -1625.169133 | -1625.251148 |
| 8     | -1625.575712 | -1625.24654  | -1625.222444 | -1625.2215   | -1625.304732 |
| TS17b | -1164.667656 | -1164.354786 | -1164.333898 | -1164.332954 | -1164.404827 |
| 18b   | -1164.674747 | -1164.361023 | -1164.339799 | -1164.338855 | -1164.411551 |
| TS18b | -1241.110539 | -1240.772878 | -1240.749141 | -1240.748197 | -1240.825996 |
| 19b   | -1241.118663 | -1240.781652 | -1240.757325 | -1240.756381 | -1240.836324 |
| TS19b | -2629.43213  | -2629.079031 | -2629.048855 | -2629.047911 | -2629.143327 |
| 13    | -2629.485447 | -2629.129779 | -2629.097511 | -2629.096567 | -2629.200609 |
| 4     | -1014.404738 | -1014.224854 | -1014.212336 | -1014.211391 | -1014.266518 |
| TS4   | -1700.727676 | -1700.396788 | -1700.371816 | -1700.370872 | -1700.45534  |
| 9     | -1700.782981 | -1700.449208 | -1700.423959 | -1700.423015 | -1700.509838 |
| TS17c | -1239.871867 | -1239.554095 | -1239.532245 | -1239.531301 | -1239.60573  |
| 18c   | -1239.879217 | -1239.560714 | -1239.538414 | -1239.53747  | -1239.613382 |
| TS18c | -1316.307867 | -1315.967261 | -1315.941811 | -1315.940867 | -1316.025548 |
| 19c   | -1316.322218 | -1315.9798   | -1315.954459 | -1315.953515 | -1316.03614  |
| TS19c | -2704.685705 | -2704.324267 | -2704.291312 | -2704.290368 | -2704.393983 |
| 14    | -2704.636492 | -2704.276809 | -2704.245624 | -2704.24468  | -2704.342729 |
| 5     | -1128.933309 | -1128.721617 | -1128.706345 | -1128.705401 | -1128.76654  |
| TS5   | -1815.254057 | -1814.891005 | -1814.863317 | -1814.862373 | -1814.953056 |
| 10    | -1815.309407 | -1814.943366 | -1814.915457 | -1814.914513 | -1815.007363 |
| TS17d | -1354.402003 | -1354.051998 | -1354.027451 | -1354.026507 | -1354.107248 |
| 18d   | -1354.406686 | -1354.055926 | -1354.030949 | -1354.030004 | -1354.112475 |
| TS18d | -1430.842    | -1430.467912 | -1430.44005  | -1430.439106 | -1430.527921 |
| 19d   | -1430.84801  | -1430.474038 | -1430.445694 | -1430.444749 | -1430.534964 |
| TS19d | -2819.166854 | -2818.776692 | -2818.742856 | -2818.741912 | -2818.846318 |
| 15    | -2819.219063 | -2818.826551 | -2818.790391 | -2818.789447 | -2818.902673 |









Table with 11 columns: Center Number, Atomic Number, Atomic Type, and Coordinates (X, Y, Z). It lists atoms 38 through 43 and 34 through 41.

8

Table 8: Coordinates (Angstroms) for atoms 1 through 43. Columns: Center Number, Atomic Number, Atomic Type, X, Y, Z.

18b

Table 18b: Coordinates (Angstroms) for atoms 1 through 41. Columns: Center Number, Atomic Number, Atomic Type, X, Y, Z.

TS17b

Table TS17b: Coordinates (Angstroms) for atoms 1 through 33. Columns: Center Number, Atomic Number, Atomic Type, X, Y, Z.

TS18b

Table TS18b: Coordinates (Angstroms) for atoms 1 through 33. Columns: Center Number, Atomic Number, Atomic Type, X, Y, Z.

|    |   |   |           |           |           |    |   |   |           |           |           |
|----|---|---|-----------|-----------|-----------|----|---|---|-----------|-----------|-----------|
| 34 | 6 | 0 | -3.100854 | 3.284178  | -1.112997 | 28 | 6 | 0 | -0.499640 | 2.301267  | 0.013871  |
| 35 | 1 | 0 | -4.173404 | 3.163096  | 0.745880  | 29 | 6 | 0 | -0.429729 | 2.917989  | -1.253348 |
| 36 | 1 | 0 | -1.911705 | 3.111823  | -2.908563 | 30 | 6 | 0 | -0.425351 | 3.070879  | 1.179681  |
| 37 | 1 | 0 | -3.438589 | 4.294210  | -1.326061 | 31 | 6 | 0 | -0.287601 | 4.312296  | -1.295474 |
| 38 | 6 | 0 | -3.563885 | 0.691865  | 1.653779  | 32 | 6 | 0 | -0.288831 | 4.456725  | 1.107589  |
| 39 | 1 | 0 | -4.385007 | -0.004940 | 1.452212  | 33 | 1 | 0 | -0.497915 | 2.595619  | 2.148018  |
| 40 | 1 | 0 | -2.770038 | 0.108995  | 2.132416  | 34 | 6 | 0 | -0.220179 | 5.082331  | -0.135693 |
| 41 | 1 | 0 | -3.921261 | 1.446073  | 2.360145  | 35 | 1 | 0 | -0.113180 | 6.160523  | -0.204769 |
| 42 | 8 | 0 | -1.144269 | -1.696405 | 3.251223  | 36 | 1 | 0 | -2.088791 | 0.110760  | 3.590953  |
| 43 | 1 | 0 | -0.884271 | -2.002186 | 2.342264  | 37 | 6 | 0 | -2.813956 | -1.030486 | -0.329796 |
| 44 | 1 | 0 | -0.390089 | -1.161734 | 3.528696  | 38 | 8 | 0 | -3.767738 | -1.815723 | -0.438862 |

**19b**

| Center Number | Atomic Number | Atomic Type | Coordinates (Angstroms) |           |           |
|---------------|---------------|-------------|-------------------------|-----------|-----------|
|               |               |             | X                       | Y         | Z         |
| 1             | 6             | 0           | -0.251884               | -0.582083 | -0.286630 |
| 2             | 6             | 0           | 0.408399                | 0.448424  | 0.398053  |
| 3             | 6             | 0           | 1.788472                | 0.541167  | 0.281389  |
| 4             | 6             | 0           | 2.543118                | -0.348926 | -0.501798 |
| 5             | 6             | 0           | 1.846996                | -1.375493 | -1.200409 |
| 6             | 6             | 0           | 0.463588                | -1.470908 | -1.105617 |
| 7             | 1             | 0           | -0.136565               | 1.162178  | 1.002829  |
| 8             | 6             | 0           | 3.984461                | -0.202741 | -0.595479 |
| 9             | 1             | 0           | -0.053723               | -2.244193 | -1.660473 |
| 10            | 6             | 0           | 4.543764                | 0.891256  | 0.168282  |
| 11            | 6             | 0           | 3.753657                | 1.711652  | 0.905406  |
| 12            | 1             | 0           | 5.614205                | 1.053815  | 0.144756  |
| 13            | 6             | 0           | 4.214497                | 2.868874  | 1.727572  |
| 14            | 1             | 0           | 5.296914                | 2.980724  | 1.660768  |
| 15            | 1             | 0           | 3.737112                | 3.792191  | 1.383299  |
| 16            | 1             | 0           | 3.933434                | 2.725046  | 2.775994  |
| 17            | 8             | 0           | 4.688631                | -0.977052 | -1.294792 |
| 18            | 8             | 0           | 2.531411                | -2.240164 | -1.974377 |
| 19            | 8             | 0           | -0.666276               | -2.778774 | 1.348268  |
| 20            | 8             | 0           | 2.405814                | 1.556848  | 0.970856  |
| 21            | 6             | 0           | -1.749087               | -3.008678 | 0.578673  |
| 22            | 1             | 0           | -2.627720               | -3.476485 | 1.090152  |
| 23            | 1             | 0           | -1.561874               | -3.707310 | -0.280015 |
| 24            | 1             | 0           | 3.489582                | -1.967245 | -1.898657 |
| 25            | 6             | 0           | -2.426204               | -1.788353 | -0.096661 |
| 26            | 8             | 0           | -3.610596               | -1.810764 | -0.429712 |
| 27            | 7             | 0           | -1.675892               | -0.618070 | -0.255742 |
| 28            | 6             | 0           | -2.364146               | 0.603246  | -0.589798 |
| 29            | 6             | 0           | -3.288223               | 1.181870  | 0.303889  |
| 30            | 6             | 0           | -2.074301               | 1.218355  | -1.813941 |
| 31            | 6             | 0           | -3.900223               | 2.382580  | -0.086512 |
| 32            | 6             | 0           | -2.691206               | 2.414132  | -2.174126 |
| 33            | 1             | 0           | -1.357308               | 0.748154  | -2.479916 |
| 34            | 6             | 0           | -3.612912               | 2.998855  | -1.303985 |
| 35            | 1             | 0           | -4.613112               | 2.844522  | 0.591763  |
| 36            | 1             | 0           | -2.456937               | 2.879996  | -3.126529 |
| 37            | 1             | 0           | -4.102841               | 3.931282  | -1.568677 |
| 38            | 6             | 0           | -3.640947               | 0.549637  | 1.626152  |
| 39            | 1             | 0           | -4.401617               | -0.226533 | 1.482470  |
| 40            | 1             | 0           | -2.783034               | 0.063205  | 2.103333  |
| 41            | 1             | 0           | -4.048870               | 1.298313  | 2.311379  |
| 42            | 8             | 0           | -1.094635               | -1.183031 | 3.294825  |
| 43            | 1             | 0           | -0.952858               | -1.841730 | 2.508048  |
| 44            | 1             | 0           | -0.565252               | -0.423150 | 3.022367  |

**TS19b**

| Center Number | Atomic Number | Atomic Type | Coordinates (Angstroms) |           |           |
|---------------|---------------|-------------|-------------------------|-----------|-----------|
|               |               |             | X                       | Y         | Z         |
| 1             | 6             | 0           | 0.637717                | 0.143051  | -0.177650 |
| 2             | 6             | 0           | 1.835454                | 0.645472  | 0.341353  |
| 3             | 6             | 0           | 3.003837                | -0.072244 | 0.106109  |
| 4             | 6             | 0           | 3.020875                | -1.268039 | -0.626703 |
| 5             | 6             | 0           | 1.791964                | -1.749436 | -1.150941 |
| 6             | 6             | 0           | 0.611722                | -1.040968 | -0.927241 |
| 7             | 1             | 0           | 1.874733                | 1.567550  | 0.905693  |
| 8             | 6             | 0           | 4.273566                | -1.980115 | -0.843209 |
| 9             | 1             | 0           | -0.309983               | -1.409906 | -1.354924 |
| 10            | 6             | 0           | 5.437897                | -1.367313 | -0.247346 |
| 11            | 6             | 0           | 5.343324                | -0.207999 | 0.452602  |
| 12            | 1             | 0           | 6.401764                | -1.846441 | -0.365238 |
| 13            | 6             | 0           | 6.470206                | 0.514206  | 1.110942  |
| 14            | 1             | 0           | 7.409574                | -0.016365 | 0.954952  |
| 15            | 1             | 0           | 6.558369                | 1.527304  | 0.705375  |
| 16            | 1             | 0           | 6.283713                | 0.605252  | 2.185958  |
| 17            | 8             | 0           | 4.317829                | -3.049211 | -1.501214 |
| 18            | 8             | 0           | 1.763905                | -2.882949 | -1.869704 |
| 19            | 8             | 0           | -1.438097               | -0.615425 | 3.572673  |
| 20            | 8             | 0           | 4.161814                | 0.439331  | 0.631529  |
| 21            | 6             | 0           | -0.576416               | -0.262330 | 2.493435  |
| 22            | 1             | 0           | -0.015510               | -1.149729 | 2.201266  |
| 23            | 1             | 0           | 0.132948                | 0.519651  | 2.795194  |
| 24            | 1             | 0           | 2.709701                | -3.207396 | -1.901295 |
| 25            | 6             | 0           | -1.471141               | 0.275936  | 1.361646  |
| 26            | 8             | 0           | -2.412056               | 1.026889  | 1.685361  |
| 27            | 7             | 0           | -0.618557               | 0.839085  | 0.071048  |

|    |    |   |           |           |           |
|----|----|---|-----------|-----------|-----------|
| 40 | 8  | 0 | -1.995057 | -1.123104 | 0.730517  |
| 41 | 1  | 0 | -1.525845 | 0.448876  | -0.731073 |
| 42 | 19 | 0 | -4.676361 | -0.809755 | -2.842269 |
| 43 | 19 | 0 | -3.483792 | -2.540838 | 2.467835  |
| 44 | 1  | 0 | -0.235670 | 5.037821  | 2.022856  |
| 45 | 1  | 0 | -0.228744 | 4.797464  | -2.265774 |
| 46 | 6  | 0 | -0.484148 | 2.140363  | -2.548344 |
| 47 | 1  | 0 | -0.388609 | 2.819260  | -3.398603 |
| 48 | 1  | 0 | -1.426705 | 1.596312  | -2.659971 |
| 49 | 1  | 0 | 0.322772  | 1.403433  | -2.617009 |

**13**

| Center Number | Atomic Number | Atomic Type | Coordinates (Angstroms) |           |           |
|---------------|---------------|-------------|-------------------------|-----------|-----------|
|               |               |             | X                       | Y         | Z         |
| 1             | 6             | 0           | -1.175336               | 0.221899  | 0.473671  |
| 2             | 6             | 0           | -2.457245               | 0.791098  | 0.318710  |
| 3             | 6             | 0           | -3.534800               | -0.055134 | 0.108562  |
| 4             | 6             | 0           | -3.415606               | -1.455223 | 0.048272  |
| 5             | 6             | 0           | -2.114140               | -2.010719 | 0.221765  |
| 6             | 6             | 0           | -1.019834               | -1.185779 | 0.426756  |
| 7             | 1             | 0           | -2.622017               | 1.857811  | 0.380891  |
| 8             | 6             | 0           | -4.577532               | -2.286595 | -0.172840 |
| 9             | 1             | 0           | -0.035264               | -1.621629 | 0.551684  |
| 10            | 6             | 0           | -5.829297               | -1.572019 | -0.316029 |
| 11            | 6             | 0           | -5.877246               | -0.219300 | -0.239912 |
| 12            | 1             | 0           | -6.739727               | -2.134731 | -0.481523 |
| 13            | 6             | 0           | -7.101333               | 0.625973  | -0.362481 |
| 14            | 1             | 0           | -7.981727               | 0.005099  | -0.530411 |
| 15            | 1             | 0           | -7.248080               | 1.215350  | 0.548652  |
| 16            | 1             | 0           | -6.995658               | 1.329507  | -1.194862 |
| 17            | 8             | 0           | -4.500120               | -3.544008 | -0.231167 |
| 18            | 8             | 0           | -1.954625               | -3.347845 | 0.175522  |
| 19            | 8             | 0           | 1.984569                | 2.381262  | -2.902852 |
| 20            | 8             | 0           | -4.766298               | 0.538277  | -0.034732 |
| 21            | 6             | 0           | 1.902902                | 1.010366  | -2.603023 |
| 22            | 1             | 0           | 2.344991                | 0.456326  | -3.437187 |
| 23            | 1             | 0           | 0.867609                | 0.652707  | -2.495138 |
| 24            | 1             | 0           | -2.869935               | -3.719964 | 0.012808  |
| 25            | 6             | 0           | 2.644433                | 0.647480  | -1.322746 |
| 26            | 8             | 0           | 3.192300                | 1.446056  | -0.595539 |
| 27            | 7             | 0           | -0.049083               | 0.978724  | 0.718345  |
| 28            | 6             | 0           | 0.114275                | 2.372046  | 0.554356  |
| 29            | 6             | 0           | 0.910234                | 3.076791  | 1.486354  |
| 30            | 6             | 0           | -0.438875               | 3.049347  | -0.545952 |
| 31            | 6             | 0           | 1.115032                | 4.445803  | 1.282386  |
| 32            | 6             | 0           | -0.228475               | 4.418955  | -0.717613 |
| 33            | 1             | 0           | -1.030548               | 2.498660  | -1.269370 |
| 34            | 6             | 0           | 0.553860                | 5.123034  | 0.198512  |
| 35            | 1             | 0           | 0.725431                | 6.187449  | 0.072479  |
| 36            | 1             | 0           | 1.602428                | 2.866311  | -2.154739 |
| 37            | 6             | 0           | 3.003563                | -1.179121 | 0.231510  |
| 38            | 8             | 0           | 3.946091                | -1.982254 | 0.178670  |
| 39            | 8             | 0           | 2.311995                | -0.785679 | 1.182293  |
| 40            | 8             | 0           | 2.596564                | -0.686683 | -1.098465 |
| 41            | 1             | 0           | 0.786131                | 0.448596  | 0.972507  |
| 42            | 19            | 0           | 3.793054                | -2.352147 | 2.965445  |
| 43            | 19            | 0           | 4.464783                | -2.628755 | -2.394723 |
| 44            | 1             | 0           | -0.669486               | 4.925758  | -1.570697 |
| 45            | 1             | 0           | 1.724543                | 4.991632  | 1.997836  |
| 46            | 6             | 0           | 1.529902                | 2.369617  | 2.666064  |
| 47            | 1             | 0           | 2.005882                | 3.085759  | 3.340243  |
| 48            | 1             | 0           | 2.290800                | 1.649294  | 2.344390  |
| 49            | 1             | 0           | 0.778595                | 1.808017  | 3.232534  |

**4**

| Center Number | Atomic Number | Atomic Type | Coordinates (Angstroms) |           |           |
|---------------|---------------|-------------|-------------------------|-----------|-----------|
|               |               |             | X                       | Y         | Z         |
| 1             | 6             | 0           | -2.938480               | 0.238267  | -0.770211 |
| 2             | 1             | 0           | -3.640082               | -0.301258 | -1.402873 |
| 3             | 1             | 0           | -2.702332               | 1.208456  | -1.205906 |
| 4             | 6             | 0           | -1.715515               | -0.643788 | -0.522269 |
| 5             | 8             | 0           | -1.826619               | -1.864908 | -0.451410 |
| 6             | 7             | 0           | -0.552121               | 0.051777  | -0.388503 |
| 7             | 17            | 0           | -3.800293               | 0.564669  | 0.803172  |
| 8             | 1             | 0           | -0.593129               | 1.060491  | -0.463136 |
| 9             | 6             | 0           | 0.743144                | -0.440879 | -0.127726 |
| 10            | 6             | 0           | 1.765576                | 0.535393  | -0.026255 |

|    |   |   |          |           |           |    |    |   |           |           |           |
|----|---|---|----------|-----------|-----------|----|----|---|-----------|-----------|-----------|
| 11 | 6 | 0 | 1.064215 | -1.791508 | 0.030364  | 27 | 7  | 0 | -2.185761 | 0.013275  | -0.298690 |
| 12 | 6 | 0 | 3.079438 | 0.148614  | 0.230292  | 28 | 17 | 0 | -3.679136 | 4.780653  | -0.185241 |
| 13 | 6 | 0 | 2.385917 | -2.169686 | 0.287302  | 29 | 1  | 0 | -1.857376 | 0.274843  | 0.623734  |
| 14 | 1 | 0 | 0.277270 | -2.527506 | -0.049208 | 30 | 6  | 0 | -2.879952 | -1.210908 | -0.351641 |
| 15 | 6 | 0 | 3.386837 | -1.207902 | 0.386862  | 31 | 6  | 0 | -3.000273 | -1.911622 | 0.874121  |
| 16 | 1 | 0 | 3.862884 | 0.892302  | 0.309415  | 32 | 6  | 0 | -3.440034 | -1.754655 | -1.510435 |
| 17 | 1 | 0 | 2.622883 | -3.221888 | 0.408281  | 33 | 6  | 0 | -3.671716 | -3.131945 | 0.920274  |
| 18 | 1 | 0 | 4.413094 | -1.500010 | 0.586166  | 34 | 6  | 0 | -4.110890 | -2.980750 | -1.454854 |
| 19 | 8 | 0 | 1.345617 | 1.825386  | -0.196851 | 35 | 1  | 0 | -3.343300 | -1.210485 | -2.439095 |
| 20 | 6 | 0 | 2.306903 | 2.876607  | -0.102489 | 36 | 6  | 0 | -4.226918 | -3.665491 | -0.248909 |
| 21 | 1 | 0 | 1.754320 | 3.801534  | -0.265776 | 37 | 1  | 0 | -3.764870 | -3.669225 | 1.856153  |
| 22 | 1 | 0 | 2.772451 | 2.898267  | 0.888664  | 38 | 1  | 0 | -4.541232 | -3.392157 | -2.362449 |
| 23 | 1 | 0 | 3.082276 | 2.773264  | -0.869158 | 39 | 1  | 0 | -4.747891 | -4.616754 | -0.203427 |

**TS4**

| Center Number | Atomic Number | Atomic Type | Coordinates (Angstroms) |           |           |
|---------------|---------------|-------------|-------------------------|-----------|-----------|
|               |               |             | X                       | Y         | Z         |
| 1             | 6             | 0           | -1.200656               | 1.033665  | 0.477276  |
| 2             | 6             | 0           | -1.793621               | -0.239746 | 0.220132  |
| 3             | 6             | 0           | -3.131620               | -0.306705 | -0.115430 |
| 4             | 6             | 0           | -3.963669               | 0.829222  | -0.225600 |
| 5             | 6             | 0           | -3.364126               | 2.102750  | 0.024166  |
| 6             | 6             | 0           | -2.028328               | 2.196650  | 0.368671  |
| 7             | 1             | 0           | -1.190628               | -1.139065 | 0.247254  |
| 8             | 6             | 0           | -5.351829               | 0.695817  | -0.581772 |
| 9             | 1             | 0           | -1.588879               | 3.169063  | 0.564724  |
| 10            | 6             | 0           | -5.806044               | -0.662669 | -0.814227 |
| 11            | 6             | 0           | -4.959068               | -1.713887 | -0.699258 |
| 12            | 1             | 0           | -6.840601               | -0.830644 | -1.087801 |
| 13            | 6             | 0           | -5.306115               | -3.150092 | -0.918837 |
| 14            | 1             | 0           | -6.357834               | -3.255087 | -1.187474 |
| 15            | 1             | 0           | -4.689704               | -3.572412 | -1.719504 |
| 16            | 1             | 0           | -5.109445               | -3.732711 | -0.012671 |
| 17            | 8             | 0           | -6.125408               | 1.691024  | -0.688294 |
| 18            | 8             | 0           | -4.127853               | 3.215145  | -0.072003 |
| 19            | 8             | 0           | 0.051851                | 1.178023  | 0.794671  |
| 20            | 8             | 0           | -3.652438               | -1.562458 | -0.358895 |
| 21            | 6             | 0           | 0.975106                | -0.280705 | 1.983638  |
| 22            | 1             | 0           | 0.004175                | -0.684071 | 2.211105  |
| 23            | 1             | 0           | 1.315733                | 0.596491  | 2.505404  |
| 24            | 1             | 0           | -5.039750               | 2.887525  | -0.321936 |
| 25            | 6             | 0           | 1.665038                | -0.796728 | 0.756203  |
| 26            | 8             | 0           | 1.214921                | -1.747431 | 0.116603  |
| 27            | 7             | 0           | 2.812260                | -0.123310 | 0.445441  |
| 28            | 17            | 0           | 1.975863                | -1.640350 | 3.465753  |
| 29            | 1             | 0           | 3.070772                | 0.654491  | 1.037817  |
| 30            | 6             | 0           | 3.693164                | -0.336008 | -0.629018 |
| 31            | 6             | 0           | 4.796559                | 0.551421  | -0.712507 |
| 32            | 6             | 0           | 3.553067                | -1.341970 | -1.589962 |
| 33            | 6             | 0           | 5.727656                | 0.420085  | -1.740326 |
| 34            | 6             | 0           | 4.493131                | -1.465631 | -2.618350 |
| 35            | 1             | 0           | 2.709389                | -2.013110 | -1.519444 |
| 36            | 6             | 0           | 5.573428                | -0.592213 | -2.695206 |
| 37            | 1             | 0           | 6.570513                | 1.097425  | -1.804170 |
| 38            | 1             | 0           | 4.370393                | -2.251538 | -3.357043 |
| 39            | 1             | 0           | 6.303732                | -0.686628 | -3.492780 |
| 40            | 8             | 0           | 4.845692                | 1.500017  | 0.272796  |
| 41            | 6             | 0           | 5.923182                | 2.434852  | 0.266477  |
| 42            | 1             | 0           | 5.760744                | 3.084135  | 1.126593  |
| 43            | 1             | 0           | 6.888587                | 1.927223  | 0.368689  |
| 44            | 1             | 0           | 5.921668                | 3.034822  | -0.650099 |

9

| Center Number | Atomic Number | Atomic Type | Coordinates (Angstroms) |           |           |
|---------------|---------------|-------------|-------------------------|-----------|-----------|
|               |               |             | X                       | Y         | Z         |
| 1             | 6             | 0           | 0.790748                | 1.388369  | 0.360658  |
| 2             | 6             | 0           | 1.357472                | 0.794188  | -0.772837 |
| 3             | 6             | 0           | 2.615488                | 0.213538  | -0.630514 |
| 4             | 6             | 0           | 3.318196                | 0.199729  | 0.582986  |
| 5             | 6             | 0           | 2.707225                | 0.810765  | 1.716573  |
| 6             | 6             | 0           | 1.453980                | 1.398570  | 1.598875  |
| 7             | 1             | 0           | 0.864135                | 0.756387  | -1.734001 |
| 8             | 6             | 0           | 4.626878                | -0.424530 | 0.666644  |
| 9             | 1             | 0           | 0.986480                | 1.869259  | 2.455402  |
| 10            | 6             | 0           | 5.112464                | -1.004812 | -0.565985 |
| 11            | 6             | 0           | 4.376382                | -0.954961 | -1.704113 |
| 12            | 1             | 0           | 6.082397                | -1.486367 | -0.572481 |
| 13            | 6             | 0           | 4.766712                | -1.513759 | -3.031287 |
| 14            | 1             | 0           | 5.749268                | -1.982823 | -2.976597 |
| 15            | 1             | 0           | 4.032699                | -2.256643 | -3.360211 |
| 16            | 1             | 0           | 4.790317                | -0.719235 | -3.784272 |
| 17            | 8             | 0           | 5.281523                | -0.452533 | 1.740525  |
| 18            | 8             | 0           | 3.349239                | 0.818410  | 2.896493  |
| 19            | 8             | 0           | -0.433603               | 1.992588  | 0.367276  |
| 20            | 8             | 0           | 3.152991                | -0.362832 | -1.751812 |
| 21            | 6             | 0           | -1.150413               | 2.137510  | -0.863156 |
| 22            | 1             | 0           | -0.495777               | 2.460843  | -1.676470 |
| 23            | 1             | 0           | -1.891942               | 2.926155  | -0.676497 |
| 24            | 1             | 0           | 4.216866                | 0.347122  | 2.734450  |
| 25            | 6             | 0           | -1.891102               | 0.874436  | -1.309828 |
| 26            | 8             | 0           | -2.210512               | 0.738451  | -2.489984 |

**TS17c**

| Center Number | Atomic Number | Atomic Type | Coordinates (Angstroms) |           |           |
|---------------|---------------|-------------|-------------------------|-----------|-----------|
|               |               |             | X                       | Y         | Z         |
| 1             | 6             | 0           | 0.160850                | -0.793596 | -0.702021 |
| 2             | 6             | 0           | -0.563495               | 0.405861  | -0.929281 |
| 3             | 6             | 0           | -1.862654               | 0.478574  | -0.472275 |
| 4             | 6             | 0           | -2.473366               | -0.541996 | 0.288626  |
| 5             | 6             | 0           | -1.683708               | -1.690378 | 0.597596  |
| 6             | 6             | 0           | -0.371655               | -1.786761 | 0.164146  |
| 7             | 1             | 0           | -0.135742               | 1.221294  | -1.499247 |
| 8             | 6             | 0           | -3.826487               | -0.402638 | 0.758594  |
| 9             | 1             | 0           | 0.199754                | -2.669885 | 0.429022  |
| 10            | 6             | 0           | -4.488766               | 0.833137  | 0.384281  |
| 11            | 6             | 0           | -3.848019               | 1.778007  | -0.344151 |
| 12            | 1             | 0           | -5.510763               | 0.998589  | 0.702442  |
| 13            | 6             | 0           | -4.415005               | 3.087437  | -0.783064 |
| 14            | 1             | 0           | -5.441718               | 3.198194  | -0.432961 |
| 15            | 1             | 0           | -3.812836               | 3.913499  | -0.390324 |
| 16            | 1             | 0           | -4.400188               | 3.161483  | -1.875535 |
| 17            | 8             | 0           | -4.396240               | -1.292430 | 1.452178  |
| 18            | 8             | 0           | -2.221171               | -2.673296 | 1.343977  |
| 19            | 8             | 0           | 0.467558                | -1.543626 | -2.446470 |
| 20            | 8             | 0           | -2.563620               | 1.624186  | -0.770723 |
| 21            | 6             | 0           | 1.480687                | -2.444955 | -2.258523 |
| 22            | 1             | 0           | 2.175765                | -2.518730 | -3.117288 |
| 23            | 1             | 0           | 1.183399                | -3.488056 | -2.025242 |
| 24            | 1             | 0           | -3.155387               | -2.368927 | 1.548399  |
| 25            | 6             | 0           | 2.327471                | -1.980951 | -1.084922 |
| 26            | 8             | 0           | 3.271089                | -2.418361 | -0.507826 |
| 27            | 7             | 0           | 1.687004                | -0.618476 | -0.665300 |
| 28            | 1             | 0           | 1.869055                | -0.006658 | -1.475461 |
| 29            | 6             | 0           | 2.259753                | 0.037839  | 0.504563  |
| 30            | 6             | 0           | 2.813678                | 1.312770  | 0.285377  |
| 31            | 6             | 0           | 2.273134                | -0.549395 | 1.763407  |
| 32            | 6             | 0           | 3.383382                | 2.000321  | 1.359237  |
| 33            | 6             | 0           | 2.841604                | 0.144316  | 2.833450  |
| 34            | 1             | 0           | 1.842281                | -1.531632 | 1.911315  |
| 35            | 6             | 0           | 3.391175                | 1.408975  | 2.625027  |
| 36            | 1             | 0           | 3.813805                | 2.983487  | 1.216655  |
| 37            | 1             | 0           | 2.854720                | -0.305690 | 3.819736  |
| 38            | 1             | 0           | 3.834782                | 1.950108  | 3.454646  |
| 39            | 8             | 0           | 2.734343                | 1.765818  | -0.995559 |
| 40            | 6             | 0           | 3.304309                | 3.041051  | -1.317207 |
| 41            | 1             | 0           | 3.133104                | 3.178891  | -2.383677 |
| 42            | 1             | 0           | 2.809367                | 3.839951  | -0.757108 |
| 43            | 1             | 0           | 4.378579                | 3.049376  | -1.110050 |

**18c**

| Center Number | Atomic Number | Atomic Type | Coordinates (Angstroms) |           |           |
|---------------|---------------|-------------|-------------------------|-----------|-----------|
|               |               |             | X                       | Y         | Z         |
| 1             | 6             | 0           | -0.079635               | -0.745609 | -0.147888 |
| 2             | 6             | 0           | 0.479953                | 0.457062  | 0.296413  |
| 3             | 6             | 0           | 1.856341                | 0.613084  | 0.194913  |
| 4             | 6             | 0           | 2.693627                | -0.388284 | -0.324791 |
| 5             | 6             | 0           | 2.097140                | -1.597786 | -0.772163 |
| 6             | 6             | 0           | 0.713487                | -1.760782 | -0.698147 |
| 7             | 1             | 0           | -0.131966               | 1.240048  | 0.725243  |
| 8             | 6             | 0           | 4.131033                | -0.173525 | -0.406845 |
| 9             | 1             | 0           | 0.267005                | -2.667906 | -1.087114 |
| 10            | 6             | 0           | 4.591195                | 1.104329  | 0.086898  |
| 11            | 6             | 0           | 3.722438                | 2.022086  | 0.581856  |
| 12            | 1             | 0           | 5.650591                | 1.326880  | 0.058805  |
| 13            | 6             | 0           | 4.077814                | 3.367789  | 1.119010  |
| 14            | 1             | 0           | 5.153257                | 3.534930  | 1.057239  |
| 15            | 1             | 0           | 3.560207                | 4.149345  | 0.553367  |
| 16            | 1             | 0           | 3.761218                | 3.453565  | 2.163661  |
| 17            | 8             | 0           | 4.903792                | -1.047269 | -0.875120 |
| 18            | 8             | 0           | 2.860354                | -2.573011 | -1.290160 |
| 19            | 8             | 0           | -0.474913               | -2.224164 | 2.292273  |
| 20            | 8             | 0           | 2.383408                | 1.798690  | 0.640080  |
| 21            | 6             | 0           | -1.386524               | -2.890541 | 1.438885  |

|    |   |   |           |           |           |    |   |   |           |           |           |
|----|---|---|-----------|-----------|-----------|----|---|---|-----------|-----------|-----------|
| 22 | 1 | 0 | -2.160549 | -3.434104 | 1.993171  | 16 | 1 | 0 | -3.802768 | -3.211965 | 2.539318  |
| 23 | 1 | 0 | -0.809115 | -3.627437 | 0.872831  | 17 | 8 | 0 | -5.020088 | 0.980060  | -0.894909 |
| 24 | 1 | 0 | 3.799261  | -2.228933 | -1.254571 | 18 | 8 | 0 | -2.971395 | 2.430726  | -1.538402 |
| 25 | 6 | 0 | -2.158692 | -1.980916 | 0.471206  | 19 | 8 | 0 | 0.510571  | 2.725618  | 1.533550  |
| 26 | 8 | 0 | -3.347363 | -2.190014 | 0.257000  | 20 | 8 | 0 | -2.471788 | -1.734601 | 0.809304  |
| 27 | 7 | 0 | -1.499888 | -0.902207 | -0.098982 | 21 | 6 | 0 | 1.490517  | 3.077328  | 0.680150  |
| 28 | 1 | 0 | -0.983153 | -1.625601 | 2.857036  | 22 | 1 | 0 | 2.395370  | 3.556636  | 1.133532  |
| 29 | 6 | 0 | -2.298207 | 0.106840  | -0.745250 | 23 | 1 | 0 | 1.180960  | 3.823903  | -0.101843 |
| 30 | 6 | 0 | -3.078888 | 0.984421  | 0.037330  | 24 | 1 | 0 | -3.909639 | 2.104275  | -1.432700 |
| 31 | 6 | 0 | -2.285510 | 0.230954  | -2.131895 | 25 | 6 | 0 | 2.153132  | 1.946869  | -0.151588 |
| 32 | 6 | 0 | -3.848632 | 1.964720  | -0.599667 | 26 | 8 | 0 | 3.313676  | 2.024365  | -0.548392 |
| 33 | 6 | 0 | -3.044326 | 1.217857  | -2.764989 | 27 | 7 | 0 | 1.414894  | 0.778899  | -0.395370 |
| 34 | 1 | 0 | -1.674935 | -0.455588 | -2.710135 | 28 | 6 | 0 | 2.124401  | -0.361060 | -0.905760 |
| 35 | 6 | 0 | -3.825910 | 2.075186  | -1.992877 | 29 | 6 | 0 | 3.039673  | -1.054457 | -0.083696 |
| 36 | 1 | 0 | -4.458369 | 2.646022  | -0.019321 | 30 | 6 | 0 | 1.910283  | -0.797180 | -2.212067 |
| 37 | 1 | 0 | -3.028071 | 1.307289  | -3.846019 | 31 | 6 | 0 | 3.730435  | -2.157603 | -0.596094 |
| 38 | 1 | 0 | -4.426136 | 2.844098  | -2.469803 | 32 | 6 | 0 | 2.588369  | -1.907566 | -2.720250 |
| 39 | 8 | 0 | -3.008255 | 0.811011  | 1.385079  | 33 | 1 | 0 | 1.202220  | -0.252398 | -2.829065 |
| 40 | 6 | 0 | -3.791133 | 1.665199  | 2.220048  | 34 | 6 | 0 | 3.501149  | -2.578640 | -1.909273 |
| 41 | 1 | 0 | -3.583044 | 1.351843  | 3.242970  | 35 | 1 | 0 | 4.438267  | -2.695520 | 0.022569  |
| 42 | 1 | 0 | -3.505660 | 2.715556  | 2.095881  | 36 | 1 | 0 | 2.409995  | -2.234099 | -3.739580 |
| 43 | 1 | 0 | -4.860924 | 1.551001  | 2.014134  | 37 | 1 | 0 | 4.042461  | -3.439417 | -2.290135 |

**TS18c**

| Center Number | Atomic Number | Atomic Type | Coordinates (Angstroms) |           |           |
|---------------|---------------|-------------|-------------------------|-----------|-----------|
|               |               |             | X                       | Y         | Z         |
| 1             | 6             | 0           | 0.152311                | 0.598758  | -0.626227 |
| 2             | 6             | 0           | -0.485396               | 0.176183  | 0.565519  |
| 3             | 6             | 0           | -1.812553               | -0.186303 | 0.509270  |
| 4             | 6             | 0           | -2.558112               | -0.227575 | -0.695246 |
| 5             | 6             | 0           | -1.871104               | 0.132978  | -1.895852 |
| 6             | 6             | 0           | -0.539723               | 0.505736  | -1.859584 |
| 7             | 1             | 0           | 0.044171                | 0.206664  | 1.509325  |
| 8             | 6             | 0           | -3.936733               | -0.638807 | -0.693227 |
| 9             | 1             | 0           | -0.041187               | 0.788215  | -2.779636 |
| 10            | 6             | 0           | -4.483755               | -0.977554 | 0.614836  |
| 11            | 6             | 0           | -3.720993               | -0.912037 | 1.732237  |
| 12            | 1             | 0           | -5.521214               | -1.284964 | 0.677633  |
| 13            | 6             | 0           | -4.171725               | -1.231792 | 3.123876  |
| 14            | 1             | 0           | -5.221521               | -1.532384 | 3.127700  |
| 15            | 1             | 0           | -3.566479               | -2.042632 | 3.545394  |
| 16            | 1             | 0           | -4.047613               | -0.359054 | 3.775058  |
| 17            | 8             | 0           | -4.637758               | -0.709068 | -1.742304 |
| 18            | 8             | 0           | -2.532730               | 0.087083  | -3.077716 |
| 19            | 8             | 0           | 0.223800                | 2.787813  | -0.394292 |
| 20            | 8             | 0           | -2.419985               | -0.535147 | 1.708852  |
| 21            | 6             | 0           | 1.542970                | 3.056595  | -0.615274 |
| 22            | 1             | 0           | 2.038889                | 3.637906  | 0.192254  |
| 23            | 1             | 0           | 1.744542                | 3.622771  | -1.552358 |
| 24            | 1             | 0           | -3.458593               | -0.209852 | -2.866885 |
| 25            | 6             | 0           | 2.371162                | 1.773968  | -0.725668 |
| 26            | 8             | 0           | 3.591926                | 1.739244  | -0.859469 |
| 27            | 7             | 0           | 1.601699                | 0.620779  | -0.643149 |
| 28            | 6             | 0           | 2.266614                | -0.640075 | -0.550452 |
| 29            | 6             | 0           | 3.011268                | -0.959560 | 0.608815  |
| 30            | 6             | 0           | 2.192371                | -1.570401 | -1.585225 |
| 31            | 6             | 0           | 3.689776                | -2.182117 | 0.684942  |
| 32            | 6             | 0           | 2.850316                | -2.802584 | -1.502084 |
| 33            | 1             | 0           | 1.609188                | -1.315271 | -2.463805 |
| 34            | 6             | 0           | 3.605678                | -3.098821 | -0.369533 |
| 35            | 1             | 0           | 4.273324                | -2.431398 | 1.563764  |
| 36            | 1             | 0           | 2.779103                | -3.512611 | -2.320764 |
| 37            | 1             | 0           | 4.133462                | -4.046029 | -0.293038 |
| 38            | 8             | 0           | 2.992533                | -0.035423 | 1.607840  |
| 39            | 6             | 0           | 3.855801                | -0.207893 | 2.717291  |
| 40            | 1             | 0           | 3.719695                | 0.679190  | 3.337730  |
| 41            | 1             | 0           | 3.593654                | -1.101617 | 3.300891  |
| 42            | 1             | 0           | 4.904194                | -0.273995 | 2.398513  |
| 43            | 8             | 0           | -0.724244               | 3.525799  | 1.962860  |
| 44            | 1             | 0           | -1.548794               | 3.028406  | 2.010152  |
| 45            | 1             | 0           | -0.344103               | 3.266606  | 1.063465  |

**19c**

| Center Number | Atomic Number | Atomic Type | Coordinates (Angstroms) |           |           |
|---------------|---------------|-------------|-------------------------|-----------|-----------|
|               |               |             | X                       | Y         | Z         |
| 1             | 6             | 0           | -0.002958               | 0.680760  | -0.325448 |
| 2             | 6             | 0           | -0.568717               | -0.463980 | 0.253438  |
| 3             | 6             | 0           | -1.948797               | -0.605318 | 0.226094  |
| 4             | 6             | 0           | -2.796164               | 0.348790  | -0.363292 |
| 5             | 6             | 0           | -2.195964               | 1.496995  | -0.952577 |
| 6             | 6             | 0           | -0.813986               | 1.643633  | -0.947750 |
| 7             | 1             | 0           | 0.046692                | -1.218248 | 0.726651  |
| 8             | 6             | 0           | -4.233856               | 0.149200  | -0.369237 |
| 9             | 1             | 0           | -0.372040               | 2.511304  | -1.421962 |
| 10            | 6             | 0           | -4.689810               | -1.066073 | 0.269760  |
| 11            | 6             | 0           | -3.813856               | -1.941941 | 0.823296  |
| 12            | 1             | 0           | -5.752101               | -1.274174 | 0.303123  |
| 13            | 6             | 0           | -4.165162               | -3.221787 | 1.506150  |
| 14            | 1             | 0           | -5.244962               | -3.372307 | 1.508429  |
| 15            | 1             | 0           | -3.687185               | -4.065941 | 0.998272  |

**TS19c**

| Center Number | Atomic Number | Atomic Type | Coordinates (Angstroms) |           |           |
|---------------|---------------|-------------|-------------------------|-----------|-----------|
|               |               |             | X                       | Y         | Z         |
| 1             | 6             | 0           | -0.581859               | -0.003261 | -0.040627 |
| 2             | 6             | 0           | -1.866281               | 0.350327  | 0.429982  |
| 3             | 6             | 0           | -2.896989               | -0.571670 | 0.345213  |
| 4             | 6             | 0           | -2.732072               | -1.861611 | -0.187304 |
| 5             | 6             | 0           | -1.431950               | -2.213456 | -0.641257 |
| 6             | 6             | 0           | -0.384083               | -1.305448 | -0.562782 |
| 7             | 1             | 0           | -2.064133               | 1.319924  | 0.864881  |
| 8             | 6             | 0           | -3.844187               | -2.786380 | -0.246981 |
| 9             | 1             | 0           | 0.593101                | -1.619994 | -0.900614 |
| 10            | 6             | 0           | -5.097000               | -2.275149 | 0.267870  |
| 11            | 6             | 0           | -5.188791               | -1.018506 | 0.770367  |
| 12            | 1             | 0           | -5.971643               | -2.913624 | 0.252111  |
| 13            | 6             | 0           | -6.418867               | -0.385797 | 1.331364  |
| 14            | 1             | 0           | -7.260848               | -1.077007 | 1.286921  |
| 15            | 1             | 0           | -6.252528               | -0.091096 | 2.372738  |
| 16            | 1             | 0           | -6.669811               | 0.520249  | 0.770040  |
| 17            | 8             | 0           | -3.720369               | -3.950754 | -0.712432 |
| 18            | 8             | 0           | -1.215178               | -3.445176 | -1.145712 |
| 19            | 8             | 0           | 1.057555                | 1.904601  | -3.084924 |
| 20            | 8             | 0           | -4.126031               | -0.172405 | 0.817345  |
| 21            | 6             | 0           | 1.480729                | 0.689635  | -2.514630 |
| 22            | 1             | 0           | 2.332635                | 0.331288  | -3.102590 |
| 23            | 1             | 0           | 0.705703                | -0.082499 | -2.534453 |
| 24            | 1             | 0           | -2.098589               | -3.911507 | -1.099384 |
| 25            | 6             | 0           | 2.004970                | 0.895033  | -1.091779 |
| 26            | 8             | 0           | 2.731155                | 1.791300  | -0.733241 |
| 27            | 7             | 0           | 0.519324                | 0.863719  | 0.083953  |
| 28            | 6             | 0           | 0.284420                | 2.202218  | 0.531774  |
| 29            | 6             | 0           | -0.489593               | 3.131920  | -0.206240 |
| 30            | 6             | 0           | 0.895100                | 2.648631  | 1.708378  |
| 31            | 6             | 0           | -0.669977               | 4.435228  | 0.261996  |
| 32            | 6             | 0           | 0.732163                | 3.955660  | 2.171964  |
| 33            | 1             | 0           | 1.503095                | 1.950006  | 2.272979  |
| 34            | 6             | 0           | -0.058642               | 4.844805  | 1.449988  |
| 35            | 1             | 0           | -0.204174               | 5.862486  | 1.798777  |
| 36            | 1             | 0           | 0.268299                | 2.190855  | -2.588460 |
| 37            | 6             | 0           | 2.972121                | -0.940184 | 0.456121  |
| 38            | 8             | 0           | 3.892467                | -1.736646 | 0.677296  |
| 39            | 8             | 0           | 2.278196                | -0.406149 | 1.449375  |
| 40            | 8             | 0           | 2.620942                | -0.618422 | -0.778937 |
| 41            | 1             | 0           | 1.492583                | 0.152629  | 1.021926  |
| 42            | 19            | 0           | 3.724256                | -1.794494 | 3.448529  |
| 43            | 19            | 0           | 4.642155                | -2.258488 | -1.933137 |
| 44            | 1             | 0           | 1.215117                | 4.267962  | 3.092360  |
| 45            | 1             | 0           | -1.273046               | 5.138916  | -0.298351 |
| 46            | 8             | 0           | -1.033904               | 2.676122  | -1.383294 |
| 47            | 6             | 0           | -2.031477               | 3.475366  | -2.033608 |
| 48            | 1             | 0           | -2.388984               | 2.875884  | -2.870351 |
| 49            | 1             | 0           | -2.859214               | 3.689554  | -1.351231 |
| 50            | 1             | 0           | -1.609715               | 4.412648  | -2.410080 |

**14**

| Center Number | Atomic Number | Atomic Type | Coordinates (Angstroms) |          |           |
|---------------|---------------|-------------|-------------------------|----------|-----------|
|               |               |             | X                       | Y        | Z         |
| 1             | 6             | 0           | 0.925369                | 0.054563 | -0.522743 |
| 2             | 6             | 0           | 2.278348                | 0.448129 | -0.494698 |

|    |    |   |           |           |           |                                              |       |   |           |           |           |
|----|----|---|-----------|-----------|-----------|----------------------------------------------|-------|---|-----------|-----------|-----------|
| 3  | 6  | 0 | 3.250943  | -0.536205 | -0.419385 | 9                                            | 1     | 0 | 2.412873  | -2.013118 | -2.650510 |
| 4  | 6  | 0 | 2.954974  | -1.911102 | -0.377272 | 10                                           | 6     | 0 | 6.132579  | 1.577659  | 0.112622  |
| 5  | 6  | 0 | 1.580676  | -2.288205 | -0.420976 | 11                                           | 6     | 0 | 5.263773  | 1.774474  | 1.133510  |
| 6  | 6  | 0 | 0.589779  | -1.322253 | -0.492245 | 12                                           | 1     | 0 | 7.096917  | 2.070943  | 0.121809  |
| 7  | 1  | 0 | 2.570594  | 1.488242  | -0.540714 | 13                                           | 6     | 0 | 5.495175  | 2.637385  | 2.330679  |
| 8  | 6  | 0 | 4.013778  | -2.892106 | -0.301090 | 14                                           | 1     | 0 | 6.477823  | 3.107759  | 2.282007  |
| 9  | 1  | 0 | -0.450189 | -1.625655 | -0.526054 | 15                                           | 1     | 0 | 4.728965  | 3.417448  | 2.391665  |
| 10 | 6  | 0 | 5.356931  | -2.350106 | -0.274905 | 16                                           | 1     | 0 | 5.429630  | 2.042233  | 3.247673  |
| 11 | 6  | 0 | 5.574638  | -1.012952 | -0.323077 | 17                                           | 8     | 0 | 6.589028  | 0.522018  | -1.969458 |
| 12 | 1  | 0 | 6.197235  | -3.031075 | -0.219209 | 18                                           | 8     | 0 | 4.805336  | -1.021564 | -3.032115 |
| 13 | 6  | 0 | 6.905535  | -0.337161 | -0.307946 | 19                                           | 8     | 0 | 0.736090  | -1.662500 | -0.710955 |
| 14 | 1  | 0 | 7.709048  | -1.072068 | -0.252326 | 20                                           | 8     | 0 | 4.041946  | 1.181588  | 1.174458  |
| 15 | 1  | 0 | 7.035081  | 0.266290  | -1.212431 | 21                                           | 6     | 0 | -0.057418 | -2.244692 | 1.134540  |
| 16 | 1  | 0 | 6.978835  | 0.338443  | 0.550664  | 22                                           | 1     | 0 | 0.906564  | -2.088820 | 1.586089  |
| 17 | 8  | 0 | 3.778866  | -4.130703 | -0.263255 | 23                                           | 1     | 0 | -0.239651 | -3.151424 | 0.584739  |
| 18 | 8  | 0 | 1.251983  | -3.594909 | -0.389247 | 24                                           | 1     | 0 | 5.644011  | -0.501379 | -2.866934 |
| 19 | 8  | 0 | -0.902239 | 1.194411  | 3.280891  | 25                                           | 6     | 0 | -0.979612 | -1.063751 | 1.057807  |
| 20 | 8  | 0 | 4.558275  | -0.111948 | -0.393038 | 26                                           | 8     | 0 | -0.710249 | -0.001829 | 1.615432  |
| 21 | 6  | 0 | -1.391665 | 0.017928  | 2.694058  | 27                                           | 7     | 0 | -2.116594 | -1.299413 | 0.331334  |
| 22 | 1  | 0 | -1.899538 | -0.567495 | 3.469155  | 28                                           | 17    | 0 | -0.893802 | -3.132434 | 3.018023  |
| 23 | 1  | 0 | -0.598791 | -0.621649 | 2.279398  | 29                                           | 1     | 0 | -2.194962 | -2.218352 | -0.081167 |
| 24 | 1  | 0 | 2.122124  | -4.087125 | -0.334804 | 30                                           | 6     | 0 | -3.193126 | -0.433610 | 0.058699  |
| 25 | 6  | 0 | -2.387524 | 0.296151  | 1.573784  | 31                                           | 6     | 0 | -4.232250 | -0.951666 | -0.727853 |
| 26 | 8  | 0 | -2.803780 | 1.388777  | 1.263137  | 32                                           | 6     | 0 | -3.254847 | 0.879968  | 0.537207  |
| 27 | 7  | 0 | -0.107966 | 0.965101  | -0.583863 | 33                                           | 6     | 0 | -5.334755 | -0.151339 | -1.032472 |
| 28 | 6  | 0 | 0.030683  | 2.370608  | -0.689369 | 34                                           | 6     | 0 | -4.370755 | 1.663090  | 0.219248  |
| 29 | 6  | 0 | 0.586058  | 3.139963  | 0.359193  | 35                                           | 1     | 0 | -2.460989 | 1.290017  | 1.141494  |
| 30 | 6  | 0 | -0.452171 | 3.031166  | -1.823747 | 36                                           | 6     | 0 | -5.421478 | 1.167460  | -0.563724 |
| 31 | 6  | 0 | 0.697554  | 4.526641  | 0.225466  | 37                                           | 1     | 0 | -6.275443 | 1.784162  | -0.800074 |
| 32 | 6  | 0 | -0.372969 | 4.419390  | -1.943087 | 38                                           | 1     | 0 | -4.199692 | -1.968121 | -1.105999 |
| 33 | 1  | 0 | -0.881478 | 2.433790  | -2.622733 | 39                                           | 8     | 0 | -4.346228 | 2.929705  | 0.729465  |
| 34 | 6  | 0 | 0.216807  | 5.162067  | -0.922368 | 40                                           | 8     | 0 | -6.292759 | -0.745922 | -1.802112 |
| 35 | 1  | 0 | 0.302222  | 6.240937  | -1.006374 | 41                                           | 6     | 0 | -5.445826 | 3.795602  | 0.460361  |
| 36 | 1  | 0 | -0.385068 | 1.659146  | 2.597572  | 42                                           | 1     | 0 | -5.214791 | 4.736274  | 0.961051  |
| 37 | 6  | 0 | -3.403120 | -0.772084 | -0.356060 | 43                                           | 1     | 0 | -5.561541 | 3.977119  | -0.614425 |
| 38 | 8  | 0 | -4.488051 | -1.371970 | -0.399982 | 44                                           | 1     | 0 | -6.382746 | 3.392712  | 0.862194  |
| 39 | 8  | 0 | -2.753031 | -0.187980 | -1.235769 | 45                                           | 6     | 0 | -7.453625 | 0.006095  | -2.147225 |
| 40 | 8  | 0 | -2.751334 | -0.860784 | 0.959274  | 46                                           | 1     | 0 | -7.197320 | 0.895243  | -2.734621 |
| 41 | 1  | 0 | -1.018162 | 0.589826  | -0.861183 | 47                                           | 1     | 0 | -8.070917 | -0.658726 | -2.752033 |
| 42 | 19 | 0 | -4.768054 | -0.617957 | -3.099219 | 48                                           | 1     | 0 | -8.015003 | 0.310089  | -1.256285 |
| 43 | 19 | 0 | -4.744574 | -2.848809 | 1.850192  | -----                                        |       |   |           |           |           |
| 44 | 1  | 0 | -0.751530 | 4.909296  | -2.834322 | <b>10</b>                                    |       |   |           |           |           |
| 45 | 1  | 0 | 1.135996  | 5.118384  | 1.019620  | -----                                        |       |   |           |           |           |
| 46 | 8  | 0 | 0.973814  | 2.451949  | 1.483170  | Center Atomic Atomic Coordinates (Angstroms) |       |   |           |           |           |
| 47 | 6  | 0 | 1.795412  | 3.126846  | 2.445609  | Number Number Type X Y Z                     | ----- |   |           |           |           |
| 48 | 1  | 0 | 2.058749  | 2.371854  | 3.185872  | 1                                            | 6     | 0 | 1.867355  | 1.375475  | 0.379730  |
| 49 | 1  | 0 | 2.702110  | 3.517961  | 1.974680  | 2                                            | 6     | 0 | 2.124754  | 0.566717  | -0.733004 |
| 50 | 1  | 0 | 1.252212  | 3.941351  | 2.935437  | 3                                            | 6     | 0 | 3.131657  | -0.388170 | -0.611501 |
|    |    |   |           |           |           | 4                                            | 6     | 0 | 3.877824  | -0.566523 | 0.562351  |
|    |    |   |           |           |           | 5                                            | 6     | 0 | 3.583525  | 0.272534  | 1.676295  |
|    |    |   |           |           |           | 6                                            | 6     | 0 | 2.585553  | 1.234141  | 1.578402  |
|    |    |   |           |           |           | 7                                            | 1     | 0 | 1.576223  | 0.640995  | -1.661564 |
|    |    |   |           |           |           | 8                                            | 6     | 0 | 4.913999  | -1.582458 | 0.626843  |
|    |    |   |           |           |           | 9                                            | 1     | 0 | 2.361327  | 1.879344  | 2.419360  |
|    |    |   |           |           |           | 10                                           | 6     | 0 | 5.092630  | -2.357331 | -0.581150 |
|    |    |   |           |           |           | 11                                           | 6     | 0 | 4.331515  | -2.130380 | -1.680626 |
|    |    |   |           |           |           | 12                                           | 1     | 0 | 5.849059  | -3.131993 | -0.600666 |
|    |    |   |           |           |           | 13                                           | 6     | 0 | 4.419992  | -2.860502 | -2.978666 |
|    |    |   |           |           |           | 14                                           | 1     | 0 | 5.195970  | -3.625046 | -2.936364 |
|    |    |   |           |           |           | 15                                           | 1     | 0 | 3.461369  | -3.335121 | -3.212300 |
|    |    |   |           |           |           | 16                                           | 1     | 0 | 4.648170  | -2.162709 | -3.790964 |
|    |    |   |           |           |           | 17                                           | 8     | 0 | 5.599572  | -1.766009 | 1.665445  |
|    |    |   |           |           |           | 18                                           | 8     | 0 | 4.276569  | 0.132260  | 2.818207  |
|    |    |   |           |           |           | 19                                           | 8     | 0 | 0.908832  | 2.348486  | 0.403883  |
|    |    |   |           |           |           | 20                                           | 8     | 0 | 3.368039  | -1.171062 | -1.711282 |
|    |    |   |           |           |           | 21                                           | 6     | 0 | 0.198798  | 2.667634  | -0.797362 |
|    |    |   |           |           |           | 22                                           | 1     | 0 | 0.864554  | 2.705100  | -1.663186 |
|    |    |   |           |           |           | 23                                           | 1     | 0 | -0.214797 | 3.671950  | -0.629373 |
|    |    |   |           |           |           | 24                                           | 1     | 0 | 4.929101  | -0.607134 | 2.648775  |
|    |    |   |           |           |           | 25                                           | 6     | 0 | -0.957770 | 1.715791  | -1.114475 |
|    |    |   |           |           |           | 26                                           | 8     | 0 | -1.401732 | 1.655879  | -2.258594 |
|    |    |   |           |           |           | 27                                           | 7     | 0 | -1.437592 | 1.041447  | -0.030864 |
|    |    |   |           |           |           | 28                                           | 17    | 0 | -1.065450 | 6.038338  | -0.015443 |
|    |    |   |           |           |           | 29                                           | 1     | 0 | -0.949698 | 1.229797  | 0.836421  |
|    |    |   |           |           |           | 30                                           | 6     | 0 | -2.506799 | 0.124970  | 0.052608  |
|    |    |   |           |           |           | 31                                           | 6     | 0 | -2.765417 | -0.426304 | 1.314332  |
|    |    |   |           |           |           | 32                                           | 6     | 0 | -3.284267 | -0.231930 | -1.053794 |
|    |    |   |           |           |           | 33                                           | 6     | 0 | -3.810384 | -1.340060 | 1.466700  |
|    |    |   |           |           |           | 34                                           | 6     | 0 | -4.325842 | -1.150726 | -0.877057 |
|    |    |   |           |           |           | 35                                           | 1     | 0 | -3.093120 | 0.189025  | -2.028781 |
|    |    |   |           |           |           | 36                                           | 6     | 0 | -4.605188 | -1.715724 | 0.374283  |
|    |    |   |           |           |           | 37                                           | 1     | 0 | -5.412861 | -2.421779 | 0.495376  |
|    |    |   |           |           |           | 38                                           | 1     | 0 | -2.169586 | -0.157359 | 2.180060  |
|    |    |   |           |           |           | 39                                           | 8     | 0 | -5.032257 | -1.442018 | -2.008388 |
|    |    |   |           |           |           | 40                                           | 8     | 0 | -3.985151 | -1.821051 | 2.731630  |
|    |    |   |           |           |           | 41                                           | 6     | 0 | -6.114526 | -2.365458 | -1.919453 |
|    |    |   |           |           |           | 42                                           | 1     | 0 | -6.524515 | -2.442667 | -2.926816 |
|    |    |   |           |           |           | 43                                           | 1     | 0 | -5.773876 | -3.354170 | -1.590969 |
|    |    |   |           |           |           | 44                                           | 1     | 0 | -6.894466 | -2.006326 | -1.238181 |
|    |    |   |           |           |           | 45                                           | 6     | 0 | -5.033313 | -2.758696 | 2.966313  |
|    |    |   |           |           |           | 46                                           | 1     | 0 | -4.892205 | -3.674108 | 2.380362  |
|    |    |   |           |           |           | 47                                           | 1     | 0 | -4.985100 | -3.000185 | 4.028422  |
|    |    |   |           |           |           | 48                                           | 1     | 0 | -6.015306 | -2.329345 | 2.737150  |

5

| Center Number | Atomic Number | Atomic Type | Coordinates (Angstroms) |           |           |
|---------------|---------------|-------------|-------------------------|-----------|-----------|
|               |               |             | X                       | Y         | Z         |
| 1             | 6             | 0           | -4.025234               | 0.607741  | 0.000039  |
| 2             | 1             | 0           | -4.479029               | 1.047315  | -0.887864 |
| 3             | 1             | 0           | -4.478772               | 1.047468  | 0.887997  |
| 4             | 6             | 0           | -2.533847               | 0.955436  | -0.000167 |
| 5             | 8             | 0           | -2.256228               | 2.151977  | -0.000310 |
| 6             | 7             | 0           | -1.651140               | -0.074373 | -0.000189 |
| 7             | 17            | 0           | -4.466114               | -1.156652 | 0.000237  |
| 8             | 1             | 0           | -2.056660               | -1.002106 | -0.000012 |
| 9             | 6             | 0           | -0.238095               | -0.031427 | -0.000129 |
| 10            | 6             | 0           | 0.422783                | -1.266153 | -0.000175 |
| 11            | 6             | 0           | 1.819084                | -1.299904 | -0.000087 |
| 12            | 6             | 0           | 1.883242                | 1.106799  | 0.000093  |
| 13            | 6             | 0           | 2.568919                | -0.114990 | 0.000052  |
| 14            | 1             | 0           | 3.648179                | -0.144172 | 0.000115  |
| 15            | 1             | 0           | -0.127213               | -2.201186 | -0.000280 |
| 16            | 8             | 0           | 2.507084                | 2.320216  | 0.000199  |
| 17            | 8             | 0           | 2.371928                | -2.546671 | -0.000143 |
| 18            | 6             | 0           | 3.932537                | 2.356525  | 0.000119  |
| 19            | 1             | 0           | 4.203921                | 3.412474  | 0.000122  |
| 20            | 1             | 0           | 4.346897                | 1.876553  | 0.894113  |
| 21            | 1             | 0           | 4.346813                | 1.876562  | -0.893919 |
| 22            | 6             | 0           | 3.793303                | -2.663594 | 0.000056  |
| 23            | 1             | 0           | 4.233621                | -2.207990 | 0.894255  |
| 24            | 1             | 0           | 4.004106                | -3.733242 | 0.000003  |
| 25            | 1             | 0           | 4.233879                | -2.207834 | -0.893941 |
| 26            | 6             | 0           | 0.484024                | 1.165324  | -0.000009 |
| 27            | 1             | 0           | -0.016388               | 2.121144  | -0.000017 |

TS5

| Center Number | Atomic Number | Atomic Type | Coordinates (Angstroms) |           |           |
|---------------|---------------|-------------|-------------------------|-----------|-----------|
|               |               |             | X                       | Y         | Z         |
| 1             | 6             | 0           | 1.906290                | -1.095969 | -0.748381 |
| 2             | 6             | 0           | 2.378873                | -0.220751 | 0.275885  |
| 3             | 6             | 0           | 3.635701                | 0.340152  | 0.157732  |
| 4             | 6             | 0           | 4.494823                | 0.100232  | -0.937090 |
| 5             | 6             | 0           | 4.013103                | -0.767929 | -1.965480 |
| 6             | 6             | 0           | 2.762000                | -1.348329 | -1.867476 |
| 7             | 1             | 0           | 1.743300                | 0.033932  | 1.115085  |
| 8             | 6             | 0           | 5.794453                | 0.715471  | -1.004460 |

10

| Center Number | Atomic Number | Atomic Type | Coordinates (Angstroms) |           |           |
|---------------|---------------|-------------|-------------------------|-----------|-----------|
|               |               |             | X                       | Y         | Z         |
| 1             | 6             | 0           | 1.867355                | 1.375475  | 0.379730  |
| 2             | 6             | 0           | 2.124754                | 0.566717  | -0.733004 |
| 3             | 6             | 0           | 3.131657                | -0.388170 | -0.611501 |
| 4             | 6             | 0           | 3.877824                | -0.566523 | 0.562351  |
| 5             | 6             | 0           | 3.583525                | 0.272534  | 1.676295  |
| 6             | 6             | 0           | 2.585553                | 1.234141  | 1.578402  |
| 7             | 1             | 0           | 1.576223                | 0.640995  | -1.661564 |
| 8             | 6             | 0           | 4.913999                | -1.582458 | 0.626843  |
| 9             | 1             | 0           | 2.361327                | 1.879344  | 2.419360  |
| 10            | 6             | 0           | 5.092630                | -2.357331 | -0.581150 |
| 11            | 6             | 0           | 4.331515                | -2.130380 | -1.680626 |
| 12            | 1             | 0           | 5.849059                | -3.131993 | -0.600666 |
| 13            | 6             | 0           | 4.419992                | -2.860502 | -2.978666 |
| 14            | 1             | 0           | 5.195970                | -3.625046 | -2.936364 |
| 15            | 1             | 0</         |                         |           |           |

| TS17d         |               |             |                         |           |           |            |
|---------------|---------------|-------------|-------------------------|-----------|-----------|------------|
| Center Number | Atomic Number | Atomic Type | Coordinates (Angstroms) |           |           |            |
|               |               |             | X                       | Y         | Z         |            |
| 1             | 6             | 0           | 0.687526                | 2.134905  | -0.458617 | 19         |
| 2             | 6             | 0           | 1.577521                | 1.251533  | -1.175885 | 8          |
| 3             | 6             | 0           | 2.318942                | 0.319342  | -0.496123 | 0          |
| 4             | 6             | 0           | 2.325809                | 0.197897  | 0.917961  | 0.85647600 |
| 5             | 6             | 0           | 1.515008                | 1.137918  | 1.643120  | 3.28412600 |
| 6             | 6             | 0           | 0.770097                | 2.088729  | 0.993517  | -          |
| 7             | 1             | 0           | 1.628966                | 1.317321  | -2.256146 | 19         |
| 8             | 6             | 0           | 3.134113                | -0.775692 | 1.572710  | 8          |
| 9             | 1             | 0           | 0.189500                | 2.794294  | 1.579299  | 0          |
| 10            | 6             | 0           | 3.923120                | -1.627453 | 0.692141  | 19         |
| 11            | 6             | 0           | 3.886421                | -1.469983 | -0.650438 | 8          |
| 12            | 1             | 0           | 4.555020                | -2.391651 | 1.128955  | 0          |
| 13            | 6             | 0           | 4.652832                | -2.270287 | -1.653317 | 19         |
| 14            | 1             | 0           | 5.272125                | -3.017755 | -1.155726 | 8          |
| 15            | 1             | 0           | 3.969193                | -2.777322 | -2.342889 | 0          |
| 16            | 1             | 0           | 5.296557                | -1.618038 | -2.253374 | 19         |
| 17            | 8             | 0           | 3.182531                | -0.902203 | 2.837894  | 8          |
| 18            | 8             | 0           | 1.532799                | 1.082240  | 3.000192  | 0          |
| 19            | 8             | 0           | 0.641080                | 3.426521  | -1.051511 | 19         |
| 20            | 8             | 0           | 3.112822                | -0.524967 | -1.254002 | 8          |
| 21            | 6             | 0           | -0.620432               | 4.055505  | -0.896528 | 0          |
| 22            | 1             | 0           | -0.766381               | 4.748208  | -1.730792 | 19         |
| 23            | 1             | 0           | -0.688466               | 4.632430  | 0.038845  | 8          |
| 24            | 1             | 0           | 2.155453                | 0.327368  | 3.219025  | 0          |
| 25            | 6             | 0           | -1.694802               | 2.969086  | -0.886452 | 19         |
| 26            | 8             | 0           | -2.906087               | 3.241708  | -0.880444 | 8          |
| 27            | 7             | 0           | -1.072080               | 1.783254  | -0.882569 | 0          |
| 28            | 6             | 0           | -1.692680               | 0.558390  | -0.608335 | 19         |
| 29            | 6             | 0           | -1.251452               | -0.586525 | -1.289347 | 8          |
| 30            | 6             | 0           | -2.700357               | 0.439884  | 0.363874  | 0          |
| 31            | 6             | 0           | -1.811879               | -1.832592 | -0.995420 | 19         |
| 32            | 6             | 0           | -3.260622               | -0.810021 | 0.634615  | 8          |
| 33            | 1             | 0           | -3.063537               | 1.312328  | 0.891033  | 0          |
| 34            | 6             | 0           | -2.824160               | -1.963774 | -0.034340 | 19         |
| 35            | 1             | 0           | -3.260289               | -2.927517 | 0.182675  | 8          |
| 36            | 1             | 0           | -0.477053               | -0.512447 | -2.041996 | 0          |
| 37            | 8             | 0           | -1.309937               | -2.885880 | -1.712419 | 19         |
| 38            | 8             | 0           | -4.243371               | -0.819177 | 1.589167  | 8          |
| 39            | 6             | 0           | -1.835648               | -4.186384 | -1.468958 | 0          |
| 40            | 1             | 0           | -1.295180               | -4.858527 | -2.136566 | 19         |
| 41            | 1             | 0           | -1.671983               | -4.500819 | -0.431378 | 8          |
| 42            | 1             | 0           | -2.907233               | -4.238668 | -1.695711 | 0          |
| 43            | 6             | 0           | -4.844406               | -2.062620 | 1.934717  | 19         |
| 44            | 1             | 0           | -4.107737               | -2.770960 | 2.332102  | 8          |
| 45            | 1             | 0           | -5.578471               | -1.836469 | 2.709069  | 0          |
| 46            | 1             | 0           | -5.354339               | -2.517637 | 1.077170  | 19         |

  

| 18d           |               |             |                         |             |   |    |
|---------------|---------------|-------------|-------------------------|-------------|---|----|
| Center Number | Atomic Number | Atomic Type | Coordinates (Angstroms) |             |   |    |
|               |               |             | X                       | Y           | Z |    |
| 1             | 6             | 0           | 0.49446800              | 1.99964300  | - | 19 |
| 2             | 6             | 0           | 1.23097500              | 0.94928700  | - | 8  |
| 3             | 6             | 0           | 2.11526000              | 0.09648400  | - | 0  |
| 4             | 6             | 0           | 2.35329500              | 0.13438800  | - | 19 |
| 5             | 6             | 0           | 1.66660300              | 1.09161400  | - | 8  |
| 6             | 6             | 0           | 0.78314700              | 1.96674500  | - | 0  |
| 7             | 1             | 0           | 1.12761800              | 0.96967400  | - | 19 |
| 8             | 6             | 0           | 3.31940100              | -0.82149700 | - | 8  |
| 9             | 1             | 0           | 0.25477600              | 2.68505100  | - | 0  |
| 10            | 6             | 0           | 3.93987000              | -1.71178000 | - | 19 |
| 11            | 6             | 0           | 3.65534600              | -1.66918900 | - | 8  |
| 12            | 1             | 0           | 4.65646500              | -2.43420800 | - | 0  |
| 13            | 6             | 0           | 4.24581300              | -2.54192900 | - | 19 |
| 14            | 1             | 0           | 4.96113000              | -3.23821300 | - | 8  |
| 15            | 1             | 0           | 3.45361700              | -3.10329400 | - | 0  |
| 16            | 1             | 0           | 4.74835700              | -1.92862400 | - | 19 |
| 17            | 8             | 0           | 3.54993000              | -0.82494800 | - | 8  |
| 18            | 8             | 0           | 1.89934500              | 1.11377800  | - | 0  |

  

| TS18d         |               |             |                         |           |           |    |
|---------------|---------------|-------------|-------------------------|-----------|-----------|----|
| Center Number | Atomic Number | Atomic Type | Coordinates (Angstroms) |           |           |    |
|               |               |             | X                       | Y         | Z         |    |
| 1             | 6             | 0           | 0.456487                | 1.188545  | 0.263666  | 19 |
| 2             | 6             | 0           | 1.328835                | 0.674295  | -0.757235 | 8  |
| 3             | 6             | 0           | 2.372968                | -0.147149 | -0.401054 | 0  |
| 4             | 6             | 0           | 2.573994                | -0.620214 | 0.918617  | 19 |
| 5             | 6             | 0           | 1.618663                | -0.209190 | 1.904957  | 8  |
| 6             | 6             | 0           | 0.569215                | 0.620080  | 1.576735  | 0  |
| 7             | 1             | 0           | 1.201161                | 0.983615  | -1.788179 | 19 |
| 8             | 6             | 0           | 3.658275                | -1.502592 | 1.227975  | 8  |
| 9             | 1             | 0           | -0.149480               | 0.903212  | 2.337689  | 0  |
| 10            | 6             | 0           | 4.519935                | -1.848514 | 0.108046  | 19 |
| 11            | 6             | 0           | 4.282015                | -1.367725 | -1.134330 | 8  |
| 12            | 1             | 0           | 5.361441                | -2.509132 | 0.278771  | 0  |
| 13            | 6             | 0           | 5.086772                | -1.654896 | -2.359818 | 19 |
| 14            | 1             | 0           | 5.918115                | -2.321205 | -2.126537 | 8  |
| 15            | 1             | 0           | 4.460656                | -2.122285 | -3.127382 | 0  |
| 16            | 1             | 0           | 5.483471                | -0.725815 | -2.782963 | 19 |
| 17            | 8             | 0           | 3.859991                | -1.961953 | 2.392882  | 8  |
| 18            | 8             | 0           | 1.753998                | -0.676387 | 3.169441  | 0  |
| 19            | 8             | 0           | 0.970430                | 2.995265  | 0.482719  | 19 |
| 20            | 8             | 0           | 3.239712                | -0.535078 | -1.407108 | 8  |
| 21            | 6             | 0           | 0.070240                | 3.730160  | -0.264338 | 0  |
| 22            | 1             | 0           | 0.472838                | 4.093138  | -1.230676 | 19 |
| 23            | 1             | 0           | -0.313734               | 4.623506  | 0.262275  | 8  |
| 24            | 1             | 0           | 2.569717                | -1.257373 | 3.146933  | 0  |
| 25            | 6             | 0           | -1.140522               | 2.857488  | -0.569206 | 19 |
| 26            | 8             | 0           | -2.177729               | 3.260864  | -1.088206 | 8  |
| 27            | 7             | 0           | -0.900835               | 1.564962  | -0.160759 | 0  |
| 28            | 6             | 0           | -1.919484               | 0.562705  | -0.201712 | 19 |
| 29            | 6             | 0           | -1.635309               | -0.716241 | -0.688836 | 8  |
| 30            | 6             | 0           | -3.199146               | 0.868278  | 0.273028  | 0  |
| 31            | 6             | 0           | -2.641101               | -1.688206 | -0.698142 | 19 |
| 32            | 6             | 0           | -4.196774               | -0.109929 | 0.240884  | 8  |

|    |   |   |           |           |           |    |   |   |           |           |           |
|----|---|---|-----------|-----------|-----------|----|---|---|-----------|-----------|-----------|
| 33 | 1 | 0 | -3.435702 | 1.851959  | 0.654510  | 17 | 8 | 0 | -5.315915 | 3.013042  | -0.478074 |
| 34 | 6 | 0 | -3.933254 | -1.400353 | -0.239797 | 18 | 8 | 0 | -2.812405 | 3.660905  | -0.328697 |
| 35 | 1 | 0 | -4.706708 | -2.153881 | -0.254612 | 19 | 8 | 0 | 0.578778  | -0.020873 | 3.539013  |
| 36 | 1 | 0 | -0.649249 | -0.969369 | -1.055059 | 20 | 8 | 0 | -4.236138 | -0.914796 | -0.082765 |
| 37 | 8 | 0 | -2.266583 | -2.907930 | -1.188074 | 21 | 6 | 0 | 0.521792  | 1.113773  | 2.691134  |
| 38 | 8 | 0 | -5.415579 | 0.284549  | 0.717459  | 22 | 1 | 0 | 0.951550  | 2.000832  | 3.178072  |
| 39 | 6 | 0 | -3.239329 | -3.947862 | -1.239817 | 23 | 1 | 0 | -0.522498 | 1.325833  | 2.461380  |
| 40 | 1 | 0 | -2.728633 | -4.814668 | -1.660360 | 24 | 1 | 0 | -3.806755 | 3.722572  | -0.413208 |
| 41 | 1 | 0 | -3.613805 | -4.198785 | -0.240555 | 25 | 6 | 0 | 1.382358  | 0.840230  | 1.439957  |
| 42 | 1 | 0 | -4.083646 | -3.677732 | -1.884760 | 26 | 8 | 0 | 2.438091  | 0.176901  | 1.625381  |
| 43 | 6 | 0 | -6.478362 | -0.664314 | 0.736993  | 27 | 7 | 0 | 0.463636  | 0.172611  | 0.181468  |
| 44 | 1 | 0 | -6.237361 | -1.526120 | 1.370206  | 28 | 6 | 0 | 0.737428  | -1.245713 | -0.010465 |
| 45 | 1 | 0 | -7.339012 | -0.140883 | 1.154546  | 29 | 6 | 0 | 0.604991  | -2.160560 | 1.033492  |
| 46 | 1 | 0 | -6.723817 | -1.014884 | -0.272284 | 30 | 6 | 0 | 1.108530  | -1.663810 | -1.287851 |
| 47 | 8 | 0 | 3.289773  | 3.359514  | -0.856874 | 31 | 6 | 0 | 0.860250  | -3.514441 | 0.788063  |
| 48 | 1 | 0 | 3.375736  | 2.517190  | -1.320585 | 32 | 6 | 0 | 1.355711  | -3.022887 | -1.521590 |
| 49 | 1 | 0 | 2.487054  | 3.207812  | -0.293278 | 33 | 1 | 0 | 1.201074  | -0.963032 | -2.109288 |

**19d**

| Center Number | Atomic Number | Atomic Type | Coordinates (Angstroms) |           |           |
|---------------|---------------|-------------|-------------------------|-----------|-----------|
|               |               |             | X                       | Y         | Z         |
| 1             | 6             | 0           | 0.394350                | 0.580921  | 0.189401  |
| 2             | 6             | 0           | 1.453925                | 0.548521  | -0.725969 |
| 3             | 6             | 0           | 2.572780                | -0.206004 | -0.407898 |
| 4             | 6             | 0           | 2.657284                | -0.982479 | 0.761261  |
| 5             | 6             | 0           | 1.546281                | -0.970610 | 1.650059  |
| 6             | 6             | 0           | 0.427390                | -0.198077 | 1.356732  |
| 7             | 1             | 0           | 1.418637                | 1.113970  | -1.648502 |
| 8             | 6             | 0           | 3.846514                | -1.768656 | 1.035541  |
| 9             | 1             | 0           | -0.408488               | -0.187415 | 2.046244  |
| 10            | 6             | 0           | 4.889300                | -1.679437 | 0.036026  |
| 11            | 6             | 0           | 4.741533                | -0.907592 | -1.069443 |
| 12            | 1             | 0           | 5.803123                | -2.242356 | 0.180499  |
| 13            | 6             | 0           | 5.743468                | -0.735757 | -2.161956 |
| 14            | 1             | 0           | 6.634529                | -1.331671 | -1.963272 |
| 15            | 1             | 0           | 5.314164                | -1.041837 | -3.121564 |
| 16            | 1             | 0           | 6.029858                | 0.317363  | -2.251015 |
| 17            | 8             | 0           | 3.953241                | -2.475575 | 2.071176  |
| 18            | 8             | 0           | 1.583633                | -1.703932 | 2.778697  |
| 19            | 8             | 0           | 1.156210                | 3.104837  | 0.868998  |
| 20            | 8             | 0           | 3.617229                | -0.179853 | -1.302800 |
| 21            | 6             | 0           | 0.407031                | 3.507592  | -0.178524 |
| 22            | 1             | 0           | 0.959761                | 3.590620  | -1.153461 |
| 23            | 1             | 0           | -0.069112               | 4.515337  | -0.076879 |
| 24            | 1             | 0           | 2.473866                | -2.157704 | 2.774699  |
| 25            | 6             | 0           | -0.824774               | 2.635652  | -0.524810 |
| 26            | 8             | 0           | -1.816691               | 3.104259  | -1.078983 |
| 27            | 7             | 0           | -0.802340               | 1.291470  | -0.126847 |
| 28            | 6             | 0           | -2.014397               | 0.522177  | -0.189250 |
| 29            | 6             | 0           | -2.042405               | -0.655677 | -0.938366 |
| 30            | 6             | 0           | -3.142564               | 0.945557  | 0.515292  |
| 31            | 6             | 0           | -3.215299               | -1.417662 | -0.976694 |
| 32            | 6             | 0           | -4.313440               | 0.183404  | 0.454222  |
| 33            | 1             | 0           | -3.127771               | 1.855747  | 1.101215  |
| 34            | 6             | 0           | -4.363581               | -1.006850 | -0.286239 |
| 35            | 1             | 0           | -5.268139               | -1.595493 | -0.321755 |
| 36            | 1             | 0           | -1.171273               | -0.991263 | -1.488355 |
| 37            | 8             | 0           | -3.149507               | -2.555592 | -1.728360 |
| 38            | 8             | 0           | -5.369482               | 0.674328  | 1.167220  |
| 39            | 6             | 0           | -4.311277               | -3.375884 | -1.826355 |
| 40            | 1             | 0           | -4.032666               | -4.213044 | -2.466948 |
| 41            | 1             | 0           | -4.617835               | -3.757515 | -0.845642 |
| 42            | 1             | 0           | -5.148388               | -2.834593 | -2.282124 |
| 43            | 6             | 0           | -6.590170               | -0.061804 | 1.172782  |
| 44            | 1             | 0           | -6.454092               | -1.063407 | 1.596866  |
| 45            | 1             | 0           | -7.277625               | 0.504729  | 1.801487  |
| 46            | 1             | 0           | -7.011682               | -0.149709 | 0.164748  |
| 47            | 8             | 0           | 3.551598                | 3.194089  | -0.046940 |
| 48            | 1             | 0           | 3.580450                | 2.453085  | -0.663331 |
| 49            | 1             | 0           | 2.607518                | 3.130359  | 0.358076  |

**TS19d**

| Center Number | Atomic Number | Atomic Type | Coordinates (Angstroms) |           |           |
|---------------|---------------|-------------|-------------------------|-----------|-----------|
|               |               |             | X                       | Y         | Z         |
| 1             | 6             | 0           | -0.919761               | 0.559829  | 0.069921  |
| 2             | 6             | 0           | -1.948101               | -0.392512 | 0.063635  |
| 3             | 6             | 0           | -3.259447               | 0.048611  | -0.078358 |
| 4             | 6             | 0           | -3.597464               | 1.402549  | -0.210583 |
| 5             | 6             | 0           | -2.539634               | 2.351005  | -0.200926 |
| 6             | 6             | 0           | -1.219633               | 1.928741  | -0.070375 |
| 7             | 1             | 0           | -1.751187               | -1.450084 | 0.163296  |
| 8             | 6             | 0           | -4.987199               | 1.805841  | -0.355622 |
| 9             | 1             | 0           | -0.436435               | 2.673353  | -0.061802 |
| 10            | 6             | 0           | -5.943637               | 0.722120  | -0.346997 |
| 11            | 6             | 0           | -5.543640               | -0.568051 | -0.213629 |
| 12            | 1             | 0           | -6.997282               | 0.950185  | -0.449315 |
| 13            | 6             | 0           | -6.433961               | -1.765065 | -0.190160 |
| 14            | 1             | 0           | -7.477761               | -1.469361 | -0.297166 |
| 15            | 1             | 0           | -6.169740               | -2.449089 | -1.003198 |
| 16            | 1             | 0           | -6.310299               | -2.309994 | 0.751403  |

|    |    |   |           |           |           |
|----|----|---|-----------|-----------|-----------|
| 17 | 8  | 0 | -5.315915 | 3.013042  | -0.478074 |
| 18 | 8  | 0 | -2.812405 | 3.660905  | -0.328697 |
| 19 | 8  | 0 | 0.578778  | -0.020873 | 3.539013  |
| 20 | 8  | 0 | -4.236138 | -0.914796 | -0.082765 |
| 21 | 6  | 0 | 0.521792  | 1.113773  | 2.691134  |
| 22 | 1  | 0 | 0.951550  | 2.000832  | 3.178072  |
| 23 | 1  | 0 | -0.522498 | 1.325833  | 2.461380  |
| 24 | 1  | 0 | -3.806755 | 3.722572  | -0.413208 |
| 25 | 6  | 0 | 1.382358  | 0.840230  | 1.439957  |
| 26 | 8  | 0 | 2.438091  | 0.176901  | 1.625381  |
| 27 | 7  | 0 | 0.463636  | 0.172611  | 0.181468  |
| 28 | 6  | 0 | 0.737428  | -1.245713 | -0.010465 |
| 29 | 6  | 0 | 0.604991  | -2.160560 | 1.033492  |
| 30 | 6  | 0 | 1.108530  | -1.663810 | -1.287851 |
| 31 | 6  | 0 | 0.860250  | -3.514441 | 0.788063  |
| 32 | 6  | 0 | 1.355711  | -3.022887 | -1.521590 |
| 33 | 1  | 0 | 1.201074  | -0.963032 | -2.109288 |
| 34 | 6  | 0 | 1.235620  | -3.960206 | -0.488028 |
| 35 | 1  | 0 | 1.429570  | -5.006866 | -0.669884 |
| 36 | 1  | 0 | 0.328363  | -1.833732 | 2.028049  |
| 37 | 1  | 0 | 1.480429  | -0.365433 | 3.400611  |
| 38 | 6  | 0 | 2.333699  | 2.347168  | -0.287462 |
| 39 | 8  | 0 | 3.253331  | 3.160020  | -0.412537 |
| 40 | 8  | 0 | 1.924318  | 1.556778  | -1.241295 |
| 41 | 8  | 0 | 1.678793  | 2.255704  | 0.897151  |
| 42 | 1  | 0 | 1.162470  | 0.844154  | -0.727591 |
| 43 | 19 | 0 | 3.751213  | 2.601193  | -3.117904 |
| 44 | 19 | 0 | 4.409779  | 2.064862  | 2.068529  |
| 45 | 8  | 0 | 1.711898  | -3.341660 | -2.798724 |
| 46 | 8  | 0 | 0.718186  | -4.340071 | 1.864360  |
| 47 | 6  | 0 | 0.949158  | -5.736675 | 1.690178  |
| 48 | 1  | 0 | 0.777428  | -6.191229 | 2.666050  |
| 49 | 1  | 0 | 0.254793  | -6.170412 | 0.961573  |
| 50 | 1  | 0 | 1.979273  | -5.936683 | 1.373866  |
| 51 | 6  | 0 | 1.966662  | -4.709447 | -3.114904 |
| 52 | 1  | 0 | 1.081017  | -5.331552 | -2.942946 |
| 53 | 1  | 0 | 2.220354  | -4.728142 | -4.174893 |
| 54 | 1  | 0 | 2.807504  | -5.105264 | -2.534067 |

**15**

| Center Number | Atomic Number | Atomic Type | Coordinates (Angstroms) |           |           |
|---------------|---------------|-------------|-------------------------|-----------|-----------|
|               |               |             | X                       | Y         | Z         |
| 1             | 6             | 0           | 1.251261                | -0.197826 | -0.296933 |
| 2             | 6             | 0           | 2.537716                | 0.374563  | -0.376950 |
| 3             | 6             | 0           | 3.639555                | -0.466734 | -0.331884 |
| 4             | 6             | 0           | 3.539650                | -1.864218 | -0.218479 |
| 5             | 6             | 0           | 2.230564                | -2.424954 | -0.155704 |
| 6             | 6             | 0           | 1.114449                | -1.604760 | -0.191554 |
| 7             | 1             | 0           | 2.686812                | 1.437167  | -0.502551 |
| 8             | 6             | 0           | 4.726929                | -2.689262 | -0.179402 |
| 9             | 1             | 0           | 0.127109                | -2.047209 | -0.128759 |
| 10            | 6             | 0           | 5.980691                | -1.969823 | -0.267617 |
| 11            | 6             | 0           | 6.007706                | -0.619088 | -0.382626 |
| 12            | 1             | 0           | 6.909101                | -2.527008 | -0.244744 |
| 13            | 6             | 0           | 7.230294                | 0.230744  | -0.486564 |
| 14            | 1             | 0           | 8.129711                | -0.384713 | -0.455242 |
| 15            | 1             | 0           | 7.218706                | 0.799782  | -1.422029 |
| 16            | 1             | 0           | 7.261697                | 0.952497  | 0.336264  |
| 17            | 8             | 0           | 4.666329                | -3.944698 | -0.079946 |
| 18            | 8             | 0           | 2.086950                | -3.760416 | -0.050945 |
| 19            | 8             | 0           | -2.255895               | -0.013776 | 3.990674  |
| 20            | 8             | 0           | 4.873897                | 0.131451  | -0.415426 |
| 21            | 6             | 0           | -1.911764               | -1.044197 | 3.095034  |
| 22            | 1             | 0           | -2.200512               | -2.014255 | 3.514601  |
| 23            | 1             | 0           | -0.827644               | -1.085474 | 2.900160  |
| 24            | 1             | 0           | 3.017970                | -4.128344 | -0.037146 |
| 25            | 6             | 0           | -2.600537               | -0.848678 | 1.755642  |
| 26            | 8             | 0           | -3.178717               | 0.176778  | 1.468945  |
| 27            | 7             | 0           | 0.086343                | 0.539556  | -0.357773 |
| 28            | 6             | 0           | -0.102263               | 1.926381  | -0.256060 |
| 29            | 6             | 0           | 0.711328                | 2.750135  | 0.534195  |
| 30            | 6             | 0           | -1.204963               | 2.475558  | -0.928536 |
| 31            | 6             | 0           | 0.429492                | 4.118101  | 0.620067  |
| 32            | 6             | 0           | -1.480612               | 3.839698  | -0.815299 |
| 33            | 1             | 0           | -1.851046               | 1.850042  | -1.534089 |
| 34            | 6             | 0           | -0.662877               | 4.684556  | -0.050258 |
| 35            | 1             | 0           | -0.872387               | 5.740827  | 0.024457  |
| 36            | 1             | 0           | 1.533105                | 2.353567  | 1.115085  |
| 37            | 1             | 0           | -2.569316               | 0.721475  | 3.437787  |
| 38            | 6             | 0           | -2.934754               | -1.785994 | -0.457409 |
| 39            | 8             | 0           | -3.863987               | -2.558105 | -0.721756 |
| 40            | 8             | 0           | -2.284540               | -0.996949 | -1.152924 |
| 41            | 8             | 0           | -2.471247               | -1.915744 | 0.952184  |
| 42            | 1             | 0           | -0.752545               | 0.007420  | -0.596408 |
| 43            | 19            | 0           | -3.823192               | -1.617017 | -3.397156 |
| 44            | 19            | 0           | -4.191549               | -4.365313 | 1.283609  |
| 45            | 8             | 0           | -2.577433               | 4.272836  | -1.504452 |
| 46            | 8             | 0           | 1.282775                | 4.833751  | 1.410392  |
| 47            | 6             | 0           | 1.046377                | 6.228949  | 1.582613  |
| 48            | 1             | 0           | 1.832258                | 6.584810  | 2.249423  |
| 49            | 1             | 0           | 1.109192                | 6.767875  | 0.630265  |
| 50            | 1             | 0           | 0.069159                | 6.417664  | 2.041755  |

|                  |                  |                |                         |           |           |    |    |   |           |           |           |
|------------------|------------------|----------------|-------------------------|-----------|-----------|----|----|---|-----------|-----------|-----------|
| 51               | 6                | 0              | -2.918873               | 5.655897  | -1.444502 | 8  | 6  | 0 | 4.622669  | -0.420122 | 0.498714  |
| 52               | 1                | 0              | -2.119900               | 6.285472  | -1.852665 | 9  | 1  | 0 | 0.988557  | 1.635476  | 2.568075  |
| 53               | 1                | 0              | -3.814016               | 5.769354  | -2.056547 | 10 | 6  | 0 | 5.114290  | -0.823258 | -0.800200 |
| 54               | 1                | 0              | -3.140225               | 5.971114  | -0.418409 | 11 | 6  | 0 | 4.391468  | -0.599889 | -1.925859 |
| -----            |                  |                |                         |           |           |    |    |   |           |           |           |
| <b>6</b>         |                  |                |                         |           |           |    |    |   |           |           |           |
| -----            |                  |                |                         |           |           |    |    |   |           |           |           |
| Center<br>Number | Atomic<br>Number | Atomic<br>Type | Coordinates (Angstroms) |           |           |    |    |   |           |           |           |
|                  |                  |                | X                       | Y         | Z         |    |    |   |           |           |           |
| 1                | 6                | 0              | -3.211930               | 0.799379  | -0.131296 | 12 | 1  | 0 | 6.077972  | -1.312535 | -0.867798 |
| 2                | 1                | 0              | -3.673617               | 0.921518  | -1.110869 | 13 | 6  | 0 | 4.789454  | -0.968426 | -3.315676 |
| 3                | 1                | 0              | -3.774747               | 1.375707  | 0.602658  | 14 | 1  | 0 | 5.764908  | -1.455259 | -3.319173 |
| 4                | 6                | 0              | -1.792303               | 1.366998  | -0.198124 | 15 | 1  | 0 | 4.049429  | -1.645572 | -3.754586 |
| 5                | 8                | 0              | -1.689926               | 2.548385  | -0.509627 | 16 | 1  | 0 | 4.832788  | -0.074874 | -3.946951 |
| 6                | 7                | 0              | -0.765187               | 0.519938  | 0.088595  | 17 | 8  | 0 | 5.264872  | -0.611634 | 1.563218  |
| 7                | 17               | 0              | -3.382326               | -0.950468 | 0.324244  | 18 | 8  | 0 | 3.334799  | 0.503324  | 2.872909  |
| 8                | 1                | 0              | -1.030883               | -0.428069 | 0.324521  | 19 | 8  | 0 | -0.406675 | 2.081315  | 0.506619  |
| 9                | 6                | 0              | 0.616773                | 0.811754  | 0.093855  | 20 | 8  | 0 | 3.176180  | 0.010083  | -1.898948 |
| 10               | 6                | 0              | 1.549368                | -0.250587 | 0.040363  | 21 | 6  | 0 | -1.122523 | 2.389263  | -0.693589 |
| 11               | 6                | 0              | 1.094416                | 2.126837  | 0.180775  | 22 | 1  | 0 | -0.468981 | 2.810387  | -1.461421 |
| 12               | 6                | 0              | 2.918967                | 0.018960  | 0.080735  | 23 | 1  | 0 | -1.859987 | 3.152940  | -0.406335 |
| 13               | 6                | 0              | 2.465564                | 2.375508  | 0.213754  | 24 | 1  | 0 | 4.198417  | 0.048580  | 2.652637  |
| 14               | 1                | 0              | 0.386469                | 2.941470  | 0.216420  | 25 | 6  | 0 | -1.868549 | 1.194775  | -1.291227 |
| 15               | 6                | 0              | 3.384686                | 1.328519  | 0.168879  | 26 | 8  | 0 | -2.207263 | 1.203211  | -2.469869 |
| 16               | 1                | 0              | 3.617904                | -0.807515 | 0.038778  | 27 | 7  | 0 | -2.137173 | 0.206794  | -0.382549 |
| 17               | 1                | 0              | 2.811964                | 3.401972  | 0.283059  | 28 | 17 | 0 | -3.488078 | 4.987156  | 0.305374  |
| 18               | 1                | 0              | 4.450847                | 1.525080  | 0.199299  | 29 | 1  | 0 | -1.789116 | 0.395341  | 0.549060  |
| 19               | 6                | 0              | 1.093551                | -1.674721 | -0.119870 | 30 | 6  | 0 | -2.789033 | -1.023586 | -0.588014 |
| 20               | 9                | 0              | 2.105066                | -2.557376 | -0.045150 | 31 | 6  | 0 | -2.663900 | -2.043692 | 0.385067  |
| 21               | 9                | 0              | 0.469467                | -1.878099 | -1.305550 | 32 | 6  | 0 | -3.574178 | -1.266601 | -1.724458 |
| 22               | 9                | 0              | 0.189108                | -2.032829 | 0.841410  | 33 | 6  | 0 | -3.322038 | -3.262605 | 0.210752  |
| -----            |                  |                |                         |           |           |    |    |   |           |           |           |
| <b>TS6</b>       |                  |                |                         |           |           |    |    |   |           |           |           |
| -----            |                  |                |                         |           |           |    |    |   |           |           |           |
| Center<br>Number | Atomic<br>Number | Atomic<br>Type | Coordinates (Angstroms) |           |           |    |    |   |           |           |           |
|                  |                  |                | X                       | Y         | Z         |    |    |   |           |           |           |
| 1                | 6                | 0              | 1.547606                | -1.055658 | 0.155253  | 34 | 6  | 0 | -4.217664 | -2.492798 | -1.883175 |
| 2                | 6                | 0              | 2.186517                | 0.215868  | 0.261278  | 35 | 1  | 0 | -3.665525 | -0.491536 | -2.471033 |
| 3                | 6                | 0              | 3.538383                | 0.316013  | -0.005897 | 36 | 6  | 0 | -4.101755 | -3.494362 | -0.919961 |
| 4                | 6                | 0              | 4.338670                | -0.783247 | -0.386157 | 37 | 1  | 0 | -3.214485 | -4.030886 | 0.966957  |
| 5                | 6                | 0              | 3.692398                | -2.053267 | -0.497941 | 38 | 1  | 0 | -4.821597 | -2.658198 | -2.770073 |
| 6                | 6                | 0              | 2.341691                | -2.181243 | -0.230005 | 39 | 1  | 0 | -4.608156 | -4.445249 | -1.045349 |
| 7                | 1                | 0              | 1.611315                | 1.099641  | 0.508495  | 40 | 6  | 0 | -1.788268 | -1.848689 | 1.591102  |
| 8                | 6                | 0              | 5.743413                | -0.615765 | -0.654735 | 41 | 9  | 0 | -1.828935 | -2.888273 | 2.442657  |
| 9                | 1                | 0              | 1.865567                | -3.152770 | -0.309798 | 42 | 9  | 0 | -2.145603 | -0.739526 | 2.305199  |
| 10               | 6                | 0              | 6.246758                | 0.737254  | -0.509549 | 43 | 9  | 0 | -0.487786 | -1.658798 | 1.250408  |
| 11               | 6                | 0              | 5.427994                | 1.754102  | -0.146898 |    |    |   |           |           |           |
| 12               | 1                | 0              | 7.295627                | 0.930438  | -0.698920 |    |    |   |           |           |           |
| 13               | 6                | 0              | 5.826612                | 3.182891  | 0.029041  |    |    |   |           |           |           |
| 14               | 1                | 0              | 6.890035                | 3.313191  | -0.174275 |    |    |   |           |           |           |
| 15               | 1                | 0              | 5.252848                | 3.824311  | -0.648240 |    |    |   |           |           |           |
| 16               | 1                | 0              | 5.615322                | 3.514453  | 1.051147  |    |    |   |           |           |           |
| 17               | 8                | 0              | 6.489323                | -1.578249 | -0.996203 |    |    |   |           |           |           |
| 18               | 8                | 0              | 4.424694                | -3.130831 | -0.860104 |    |    |   |           |           |           |
| 19               | 8                | 0              | 0.277702                | -1.230172 | 0.384069  |    |    |   |           |           |           |
| 20               | 8                | 0              | 4.105385                | 1.569998  | 0.104003  |    |    |   |           |           |           |
| 21               | 6                | 0              | -0.636081               | -0.132211 | 1.900744  |    |    |   |           |           |           |
| 22               | 1                | 0              | 0.331157                | 0.179974  | 2.253824  |    |    |   |           |           |           |
| 23               | 1                | 0              | -1.003491               | -1.107893 | 2.166152  |    |    |   |           |           |           |
| 24               | 1                | 0              | 5.355365                | -2.786123 | -0.987864 |    |    |   |           |           |           |
| 25               | 6                | 0              | -1.276171               | 0.699919  | 0.831002  |    |    |   |           |           |           |
| 26               | 8                | 0              | -0.803666               | 1.777985  | 0.483659  |    |    |   |           |           |           |
| 27               | 7                | 0              | -2.422490               | 0.140910  | 0.315299  |    |    |   |           |           |           |
| 28               | 17               | 0              | -1.681258               | 0.817208  | 3.643359  |    |    |   |           |           |           |
| 29               | 1                | 0              | -2.662190               | -0.768627 | 0.681896  |    |    |   |           |           |           |
| 30               | 6                | 0              | -3.260013               | 0.639780  | -0.696797 |    |    |   |           |           |           |
| 31               | 6                | 0              | -4.515628               | 0.023577  | -0.926358 |    |    |   |           |           |           |
| 32               | 6                | 0              | -2.887371               | 1.722393  | -1.510306 |    |    |   |           |           |           |
| 33               | 6                | 0              | -5.349871               | 0.487405  | -1.945950 |    |    |   |           |           |           |
| 34               | 6                | 0              | -3.737494               | 2.172010  | -2.518505 |    |    |   |           |           |           |
| 35               | 1                | 0              | -1.934349               | 2.199347  | -1.337948 |    |    |   |           |           |           |
| 36               | 6                | 0              | -4.968607               | 1.559376  | -2.748472 |    |    |   |           |           |           |
| 37               | 1                | 0              | -6.305282               | 0.001578  | -2.103062 |    |    |   |           |           |           |
| 38               | 1                | 0              | -3.423291               | 3.009693  | -3.133739 |    |    |   |           |           |           |
| 39               | 1                | 0              | -5.625466               | 1.910032  | -3.537082 |    |    |   |           |           |           |
| 40               | 6                | 0              | -5.004391               | -1.092477 | -0.046484 |    |    |   |           |           |           |
| 41               | 9                | 0              | -6.153485               | -1.638735 | -0.483323 |    |    |   |           |           |           |
| 42               | 9                | 0              | -5.216125               | -0.681521 | 1.228607  |    |    |   |           |           |           |
| 43               | 9                | 0              | -4.096874               | -2.112668 | 0.041631  |    |    |   |           |           |           |
| -----            |                  |                |                         |           |           |    |    |   |           |           |           |
| <b>11</b>        |                  |                |                         |           |           |    |    |   |           |           |           |
| -----            |                  |                |                         |           |           |    |    |   |           |           |           |
| Center<br>Number | Atomic<br>Number | Atomic<br>Type | Coordinates (Angstroms) |           |           |    |    |   |           |           |           |
|                  |                  |                | X                       | Y         | Z         |    |    |   |           |           |           |
| 1                | 6                | 0              | 0.812474                | 1.467690  | 0.423586  |    |    |   |           |           |           |
| 2                | 6                | 0              | 1.384131                | 1.037832  | -0.778949 |    |    |   |           |           |           |
| 3                | 6                | 0              | 2.633676                | 0.425691  | -0.711088 |    |    |   |           |           |           |
| 4                | 6                | 0              | 3.322416                | 0.227610  | 0.494102  |    |    |   |           |           |           |
| 5                | 6                | 0              | 2.706171                | 0.675543  | 1.698647  |    |    |   |           |           |           |
| 6                | 6                | 0              | 1.460693                | 1.289727  | 1.656381  |    |    |   |           |           |           |
| 7                | 1                | 0              | 0.901742                | 1.146541  | -1.740263 |    |    |   |           |           |           |
| -----            |                  |                |                         |           |           |    |    |   |           |           |           |
| <b>18e</b>       |                  |                |                         |           |           |    |    |   |           |           |           |
| -----            |                  |                |                         |           |           |    |    |   |           |           |           |
| Center<br>Number | Atomic<br>Number | Atomic<br>Type | Coordinates (Angstroms) |           |           |    |    |   |           |           |           |
|                  |                  |                | X                       | Y         | Z         |    |    |   |           |           |           |
| 1                | 6                | 0              | -0.012000               | -1.214370 | -0.834221 |    |    |   |           |           |           |
| 2                | 6                | 0              | -0.673874               | 0.063850  | -1.155478 |    |    |   |           |           |           |
| 3                | 6                | 0              | -1.928895               | 0.343231  | -0.702659 |    |    |   |           |           |           |
| 4                | 6                | 0              | -2.701054               | -0.528121 | 0.120658  |    |    |   |           |           |           |
| 5                | 6                | 0              | -2.075953               | -1.778324 | 0.470902  |    |    |   |           |           |           |
